# Supplementary material for: Genetic Correlation and Bidirectional Causal Association Between Type 2 Diabetes and Pulmonary Function
Source: Front Endocrinol (Lausanne). 2021 Nov 25;12:777487. doi: 10.3389/fendo.2021.777487 (PMC8655865; doi:10.3389/fendo.2021.777487)
Supplement: Supplementary file 1 [file DataSheet_1.xlsx]

## Sheet: Sheet1
Supplementary Table 1 Characteristics of the SNPs used as IVs for T2D in the MR analysis.
SNP	Nearest gene	Chr	Position	EA	NEA	EAF	Beta	SE	P-value	R2a	F-statisticb
rs1005752	HMG20A	15	77818128	A	C	0.72	0.03	0.004	1.4e-21	6.965e-05	56.2499
rs10096633	LPL	8	19830921	C	T	0.88	0.03	0.004	2.9e-09	6.965e-05	56.2499
rs10097617	TP53INP1	8	95961626	T	C	0.48	0.02	0.004	5.6e-12	3.09568e-05	24.9999
rs10193538	BNIPL	2	58981064	T	G	0.61	0.02	0.002	2.5e-09	0.000123816	99.9998
rs10195252	GRB14/COBLL1	2	165513091	T	C	0.59	0.03	0.002	7.4e-18	0.000278542	224.999
rs10228066	DGKB	7	15063569	T	C	0.54	0.03	0.004	2.9e-21	6.965e-05	56.2499
rs10406431	GIPR	19	46157019	A	G	0.56	0.03	0.004	8.2e-17	6.965e-05	56.2499
rs1042725	HMGA2	12	66358347	T	C	0.49	0.03	0.002	8e-15	0.000278542	224.999
rs1043246	ZZEF1	17	3828086	G	C	0.16	0.03	0.004	7.9e-12	6.965e-05	56.2499
rs1061810	HSD17B12	11	43877934	A	C	0.29	0.02	0.002	3.9e-09	0.000123816	99.9998
rs10750397	ETS1	11	128234144	A	G	0.28	0.02	0.002	1.9e-08	0.000123816	99.9998
rs10811660	CDKN2A/B	9	22134068	G	A	0.83	0.07	0.004	2.2e-61	0.000379088	306.249
rs10830963	MTNR1B	11	92708710	G	C	0.28	0.05	0.004	1.7e-40	0.000193448	156.25
rs10842994	KLHDC5	12	27965150	C	T	0.81	0.03	0.004	2.5e-17	6.965e-05	56.2499
rs10882101	HHEX/IDE	10	94462427	T	C	0.59	0.05	0.002	5.6e-50	0.000773344	624.998
rs10893829	ETS1	11	128042575	T	C	0.85	0.03	0.004	5.1e-09	6.965e-05	56.2499
rs10937721	WFS1	4	6306763	C	G	0.59	0.04	0.004	1.3e-33	0.000123816	99.9998
rs10962	HNF1B	17	36046451	C	G	0.23	0.02	0.004	4.4e-08	3.09568e-05	24.9999
rs10974438	GLIS3	9	4291928	C	A	0.36	0.03	0.002	1.7e-13	0.000278542	224.999
rs11070332	LTK	15	41809205	A	G	0.36	0.02	0.004	9.4e-12	3.09568e-05	24.9999
rs1112718	HHEX/IDE	10	94479107	A	G	0.6	0.05	0.004	2.7e-47	0.000193448	156.25
rs11202627	PTEN	10	89769340	T	C	0.15	0.03	0.004	2e-08	6.965e-05	56.2499
rs112498319	RREB1	6	7035734	C	A	0.41	0.02	0.002	3.9e-10	0.000123816	99.9998
rs1127215	PTGFRN	1	117532790	C	T	0.58	0.02	0.002	5.1e-10	0.000123816	99.9998
rs115505614	PAM	5	102422968	T	C	0.05	0.08	0.009	1.1e-24	9.78321e-05	79.0121
rs11688682	GLI2	2	121347612	G	C	0.73	0.03	0.004	5.4e-12	6.965e-05	56.2499
rs11688931	GLI2	2	121318166	C	G	0.85	0.03	0.004	2.2e-09	6.965e-05	56.2499
rs11699802	CEBPB	20	48832135	C	T	0.54	0.02	0.004	1.7e-12	3.09568e-05	24.9999
rs117001013	YWHAH	22	32348841	C	T	0.91	0.03	0.006	4.8e-08	3.09568e-05	24.9999
rs11708067	ADCY5	3	123065778	A	G	0.77	0.04	0.004	9.3e-28	0.000123816	99.9998
rs11709077	PPARG	3	12336507	G	A	0.88	0.04	0.004	9e-18	0.000123816	99.9998
rs11759026	CENPW	6	126792095	G	A	0.23	0.03	0.004	6.1e-14	6.965e-05	56.2499
rs11786992	TP53INP1	8	95685147	A	C	0.64	0.02	0.004	3.8e-08	3.09568e-05	24.9999
rs11820019	CCND1	11	69448758	T	C	0.97	0.06	0.009	9.1e-09	5.50329e-05	44.4443
rs11926707	KIF9	3	46925539	C	T	0.63	0.02	0.004	4.4e-08	3.09568e-05	24.9999
rs12001437	UBAP2	9	34074476	C	T	0.37	0.02	0.004	2.5e-08	3.09568e-05	24.9999
rs12140153	PATJ	1	62579891	G	T	0.91	0.03	0.004	1.2e-08	6.965e-05	56.2499
rs12454712	BCL2A	18	60845884	T	C	0.61	0.03	0.002	4.7e-13	0.000278542	224.999
rs1260326	GCKR	2	27730940	C	T	0.61	0.03	0.002	9.6e-25	0.000278542	224.999
rs12642790	SCD5	4	83578271	A	G	0.34	0.02	0.002	2.5e-09	0.000123816	99.9998
rs12811407	FBRSL1	12	133069698	A	G	0.33	0.02	0.004	2.4e-10	3.09568e-05	24.9999
rs12910825	PRC1	15	91511260	G	A	0.36	0.03	0.004	8.1e-16	6.965e-05	56.2499
rs13085136	SHQ1	3	72865183	C	T	0.93	0.04	0.006	2.5e-09	5.50329e-05	44.4443
rs1316776	DMGDH	5	78430607	C	A	0.65	0.02	0.002	3.8e-09	0.000123816	99.9998
rs13262861	ANK1	8	41508577	C	A	0.83	0.05	0.004	3.2e-27	0.000193448	156.25
rs1359790	SPRY2	13	80717156	G	A	0.72	0.04	0.002	3.8e-25	0.000495078	399.999
rs13737	PTPN9	15	75932129	G	T	0.76	0.02	0.004	5.2e-10	3.09568e-05	24.9999
rs1377807	ZZEF1	17	4045440	C	G	0.31	0.03	0.004	1.7e-13	6.965e-05	56.2499
rs138337556	SLCO6A1	5	101232944	G	A	0.0036	0.22	0.033	4.3e-11	5.50329e-05	44.4443
rs1412234	LINGO2	9	28410683	C	T	0.32	0.02	0.002	3.4e-09	0.000123816	99.9998
rs1412830	CDKN2A/B	9	22043612	C	T	0.63	0.02	0.004	8.8e-11	3.09568e-05	24.9999
rs1421085	FTO	16	53800954	C	T	0.42	0.05	0.004	1.1e-60	0.000193448	156.25
rs1426371	WSCD2	12	108629780	G	A	0.74	0.03	0.002	3.3e-11	0.000278542	224.999
rs145678014	QSER1	11	32927778	G	T	0.96	0.05	0.008	1.6e-08	4.83691e-05	39.0624
rs146886108	ANKH	5	14751305	C	T	0.99	0.17	0.023	6.7e-14	6.76459e-05	54.6312
rs148766658	ANK1	8	41552046	C	T	0.04	0.05	0.01	3.2e-10	3.09568e-05	24.9999
rs149364428	CPQ	8	97737741	A	G	0.01	0.12	0.018	1.2e-11	5.50329e-05	44.4443
rs1493694	NOTCH2	1	120526982	T	C	0.11	0.04	0.006	8e-14	5.50329e-05	44.4443
rs1531583	PCGF3	4	744972	T	G	0.05	0.05	0.008	1.1e-10	4.83691e-05	39.0624
rs1562396	KLF14	7	130457914	G	A	0.32	0.03	0.004	8.1e-14	6.965e-05	56.2499
rs1580278	SLC9B1	4	104140848	C	A	0.47	0.02	0.004	1.9e-08	3.09568e-05	24.9999
rs17013314	UBE2E2	3	23510044	G	A	0.03	0.05	0.01	1e-08	3.09568e-05	24.9999
rs1708302	JAZF1	7	28198677	C	T	0.51	0.04	0.002	6.4e-31	0.000495078	399.999
rs17168486	DGKB	7	14898282	T	C	0.18	0.03	0.004	3.1e-14	6.965e-05	56.2499
rs17250977	ANKH	5	14753745	G	A	0.04	0.06	0.009	1.2e-12	5.50329e-05	44.4443
rs17689007	MSRA	8	9974824	G	A	0.53	0.02	0.004	2.5e-11	3.09568e-05	24.9999
rs177045	NEUROG3	10	71321279	G	A	0.32	0.02	0.004	2.2e-10	3.09568e-05	24.9999
rs17791513	TLE4	9	81905590	A	G	0.93	0.05	0.006	3e-12	8.59863e-05	69.4443
rs17819328	PPARG	3	12489342	G	T	0.42	0.02	0.004	2.6e-08	3.09568e-05	24.9999
rs1783541	MAP3K11	11	65294799	T	C	0.2	0.03	0.004	5.2e-12	6.965e-05	56.2499
rs17836088	NRXN3	14	79932041	C	G	0.22	0.03	0.002	6.9e-13	0.000278542	224.999
rs1800574	HNF1A	12	121416864	T	C	0.03	0.06	0.009	3.5e-11	5.50329e-05	44.4443
rs1800961	HNF4A	20	43042364	T	C	0.04	0.07	0.009	1.1e-16	7.49044e-05	60.4937
rs1801212	WFS1	4	6302519	A	G	0.71	0.04	0.004	1.3e-34	0.000123816	99.9998
rs1801645	PIM3	22	50356850	C	T	0.28	0.03	0.002	1.2e-10	0.000278542	224.999
rs180988137	TCF7L2	10	114751173	G	A	0.01	0.14	0.017	2.4e-16	8.39751e-05	67.8199
rs184509201	TCF7L2	10	114740337	C	G	0.98	0.08	0.013	3.1e-11	4.68923e-05	37.8697
rs199795270	FAM57B	16	30419384	C	G	0.01	0.12	0.019	2.6e-08	4.93927e-05	39.8891
rs2028150	CEP68	2	65655012	C	G	0.6	0.02	0.004	5.1e-11	3.09568e-05	24.9999
rs2197973	USP44	12	95928560	T	C	0.54	0.02	0.004	9.5e-09	3.09568e-05	24.9999
rs2237895	KCNQ1	11	2857194	C	A	0.43	0.05	0.002	3.6e-42	0.000773344	624.998
rs2237897	KCNQ1	11	2858546	C	T	0.95	0.09	0.007	1.3e-28	0.000204658	165.306
rs2238689	GIPR	19	46178661	C	T	0.42	0.03	0.002	8.7e-15	0.000278542	224.999
rs2249105	CEP68	2	65287896	A	G	0.63	0.02	0.004	1.4e-11	3.09568e-05	24.9999
rs2258238	HMGA2	12	66221060	T	A	0.1	0.05	0.004	3.3e-23	0.000193448	156.25
rs2280141	PLEKHA1	10	124193181	T	G	0.52	0.02	0.004	2.7e-08	3.09568e-05	24.9999
rs2283220	KCNQ1	11	2755548	A	G	0.69	0.02	0.004	1.4e-09	3.09568e-05	24.9999
rs2307111	POC5	5	75003678	T	C	0.61	0.02	0.004	6.5e-13	3.09568e-05	24.9999
rs231361	KCNQ1	11	2691500	A	G	0.26	0.03	0.004	2.4e-15	6.965e-05	56.2499
rs243024	BCL11A	2	60583665	A	G	0.46	0.03	0.002	7.2e-15	0.000278542	224.999
rs2456530	ONECUT1	15	53091553	T	C	0.13	0.03	0.004	1.3e-09	6.965e-05	56.2499
rs2642588	NEUROG3	10	71466578	G	T	0.7	0.02	0.004	2.3e-09	3.09568e-05	24.9999
rs2796441	TLE1	9	84308948	G	A	0.59	0.03	0.004	4.6e-21	6.965e-05	56.2499
rs2800733	SOGA3	6	127416930	A	G	0.72	0.03	0.002	4.3e-12	0.000278542	224.999
rs2820446	LYPLAL1	1	219748818	C	G	0.71	0.02	0.004	2.7e-10	3.09568e-05	24.9999
rs28505901	GPSM1	9	139241030	G	A	0.75	0.03	0.004	7.2e-19	6.965e-05	56.2499
rs291367	GNG4	1	235690800	G	A	0.63	0.02	0.004	3.4e-08	3.09568e-05	24.9999
rs2925979	CMIP	16	81534790	T	C	0.3	0.02	0.004	3.9e-08	3.09568e-05	24.9999
rs2972144	IRS1	2	227101411	G	A	0.64	0.04	0.004	3.7e-37	0.000123816	99.9998
rs3111316	FARSA	19	13038415	A	G	0.59	0.02	0.004	1.6e-12	3.09568e-05	24.9999
rs3217792	CCND2	12	4384696	C	T	0.91	0.05	0.006	9.4e-20	8.59863e-05	69.4443
rs3217860	CCND2	12	4399050	G	A	0.26	0.03	0.002	6.1e-11	0.000278542	224.999
rs329122	PHF15	5	133864599	A	G	0.43	0.02	0.004	3.3e-08	3.09568e-05	24.9999
rs340874	PROX1	1	214159256	C	T	0.56	0.03	0.004	3.8e-21	6.965e-05	56.2499
rs34715063	RASGRP1	15	38873115	C	T	0.12	0.04	0.004	6.3e-13	0.000123816	99.9998
rs348330	ABCB10	1	229672955	G	A	0.36	0.02	0.004	8.4e-11	3.09568e-05	24.9999
rs34855406	MLX	17	40731411	C	G	0.28	0.02	0.004	1e-09	3.09568e-05	24.9999
rs35352848	UBE2E2	3	23455582	T	C	0.79	0.04	0.004	2.9e-20	0.000123816	99.9998
rs35895680	TTLL6	17	47060322	C	A	0.68	0.03	0.002	5.7e-12	0.000278542	224.999
rs35913461	TMEM18	2	653575	C	T	0.83	0.03	0.004	3.7e-09	6.965e-05	56.2499
rs3768321	MACF1	1	40035928	T	G	0.2	0.04	0.004	3.3e-20	0.000123816	99.9998
rs3774723	PSMD6	3	63962339	G	A	0.84	0.03	0.004	1.1e-10	6.965e-05	56.2499
rs3798519	TFAP2B	6	50788778	C	A	0.18	0.03	0.004	4.7e-12	6.965e-05	56.2499
rs3802177	SLC30A8	8	118185025	G	A	0.69	0.05	0.004	3.1e-45	0.000193448	156.25
rs3810291	ZC3H4	19	47569003	A	G	0.67	0.03	0.002	5.8e-12	0.000278542	224.999
rs3887925	ST6GAL1	3	186665645	T	C	0.55	0.03	0.002	2.1e-14	0.000278542	224.999
rs41277236	NEUROG3	10	71332301	T	C	0.04	0.05	0.01	2.1e-09	3.09568e-05	24.9999
rs4148856	MPHOSPH9	12	123450765	C	G	0.78	0.02	0.004	1.4e-08	3.09568e-05	24.9999
rs4238013	CCND2	12	4376089	C	T	0.21	0.03	0.004	1.2e-10	6.965e-05	56.2499
rs4279506	IGF2BP3	7	23512896	G	C	0.61	0.02	0.004	1.5e-08	3.09568e-05	24.9999
rs429358	TOMM40/APOE	19	45411941	T	C	0.85	0.03	0.004	2.4e-10	6.965e-05	56.2499
rs4457053	ZBED3	5	76424949	G	A	0.3	0.03	0.004	5e-14	6.965e-05	56.2499
rs465002	ANKRD55	5	55808475	T	C	0.74	0.03	0.004	6e-20	6.965e-05	56.2499
rs4686471	LPP	3	187740899	C	T	0.61	0.03	0.004	1.1e-19	6.965e-05	56.2499
rs4688760	RBM6	3	49980596	T	C	0.68	0.02	0.002	3.7e-09	0.000123816	99.9998
rs4709746	QKI	6	164133001	C	T	0.87	0.03	0.004	8.7e-09	6.965e-05	56.2499
rs4736819	ANK1	8	41509915	T	C	0.55	0.03	0.002	1.1e-24	0.000278542	224.999
rs474513	SLC22A3	6	160770312	A	G	0.52	0.02	0.004	8.1e-09	3.09568e-05	24.9999
rs4804833	MAP2K7	19	7970635	A	G	0.39	0.03	0.002	3.3e-13	0.000278542	224.999
rs4810426	HNF4A	20	43001721	T	C	0.11	0.04	0.004	1e-14	0.000123816	99.9998
rs4925109	RAI1	17	17661802	A	G	0.32	0.02	0.004	3.5e-08	3.09568e-05	24.9999
rs4929965	INS/IGF2	11	2197286	A	G	0.38	0.03	0.002	2e-23	0.000278542	224.999
rs4932265	AP3S2	15	90423293	T	C	0.27	0.03	0.004	6.6e-17	6.965e-05	56.2499
rs5213	KCNJ11	11	17408404	C	T	0.36	0.03	0.002	6.8e-18	0.000278542	224.999
rs523288	MC4R	18	57848369	T	A	0.24	0.03	0.004	1.7e-12	6.965e-05	56.2499
rs536643418	TCF7L2	10	114699835	G	C	0.01	0.22	0.04	3.8e-08	3.74574e-05	30.2499
rs539515	SEC16B	1	177889025	C	A	0.2	0.03	0.004	2.6e-10	6.965e-05	56.2499
rs55653563	ZNF169	9	97001682	A	C	0.73	0.02	0.002	3.2e-08	0.000123816	99.9998
rs562386202	DDX18	2	118071061	G	A	0.0006	0.51	0.092	3.4e-08	3.8052e-05	30.7301
rs56337234	MAEA	4	1784403	C	T	0.5	0.03	0.004	1.2e-15	6.965e-05	56.2499
rs56348580	HNF1A	12	121432117	G	C	0.69	0.03	0.002	6.5e-13	0.000278542	224.999
rs571342427	INS/IGF2	11	2182519	C	T	0.0015	0.27	0.048	1.7e-08	3.91793e-05	31.6405
rs57235767	MTNR1B	11	93013531	C	T	0.71	0.02	0.004	2.9e-09	3.09568e-05	24.9999
rs58432198	FAF1	1	51256091	C	T	0.88	0.03	0.004	3.9e-08	6.965e-05	56.2499
rs58730668	ACSL1	4	185717759	T	C	0.86	0.03	0.004	4.2e-10	6.965e-05	56.2499
rs601945	MHC	6	32573415	G	A	0.18	0.03	0.004	1.4e-15	6.965e-05	56.2499
rs6063048	EYA2	20	45598564	G	A	0.72	0.02	0.002	1.1e-08	0.000123816	99.9998
rs61676547	BPTF	17	65892507	C	G	0.19	0.02	0.004	4e-08	3.09568e-05	24.9999
rs62107261	TMEM18	2	422144	T	C	0.95	0.05	0.01	3.6e-09	3.09568e-05	24.9999
rs62492368	AOC1	7	150537635	A	G	0.31	0.02	0.004	2.4e-10	3.09568e-05	24.9999
rs6458354	VEGFA	6	43814190	C	T	0.29	0.02	0.004	3.4e-09	3.09568e-05	24.9999
rs6459733	MNX1	7	156930550	G	C	0.67	0.03	0.002	7.1e-17	0.000278542	224.999
rs6518681	MTMR3/ASCC2	22	30609554	G	A	0.91	0.04	0.006	1.7e-10	5.50329e-05	44.4443
rs6600191	ITFG3	16	295795	T	C	0.82	0.03	0.004	1.6e-12	6.965e-05	56.2499
rs6708643	THADA	2	43430440	A	G	0.5	0.02	0.004	2.1e-08	3.09568e-05	24.9999
rs67232546	ETS1	11	128398938	T	C	0.21	0.03	0.004	3e-10	6.965e-05	56.2499
rs67254669	KCNJ11	11	17470143	G	A	0.001	0.29	0.051	3.2e-08	4.00375e-05	32.3336
rs6780171	IGF2BP2	3	185503456	A	T	0.31	0.05	0.002	4.4e-45	0.000773344	624.998
rs6885132	ANKH	5	14768092	C	G	0.9	0.04	0.006	1.6e-12	5.50329e-05	44.4443
rs7022807	HAUS6	9	19067833	G	A	0.4	0.02	0.004	4.9e-09	3.09568e-05	24.9999
rs702634	ARL15	5	53271420	A	G	0.69	0.02	0.004	1.1e-09	3.09568e-05	24.9999
rs7078559	HHEX/IDE	10	93924663	T	C	0.58	0.02	0.002	1.8e-10	0.000123816	99.9998
rs7115753	CRY2	11	45912013	A	G	0.45	0.02	0.004	2.6e-08	3.09568e-05	24.9999
rs7178762	USP3	15	63871292	C	T	0.46	0.02	0.004	6.9e-09	3.09568e-05	24.9999
rs718314	ITPR2	12	26453283	G	A	0.25	0.02	0.004	3.5e-10	3.09568e-05	24.9999
rs7222481	GLP2R	17	9785187	C	G	0.32	0.02	0.002	1.5e-08	0.000123816	99.9998
rs72631105	WDR11	10	122915345	A	G	0.19	0.02	0.004	3.1e-08	3.09568e-05	24.9999
rs72802342	BCAR1	16	75234872	C	A	0.92	0.06	0.008	5.1e-25	6.965e-05	56.2499
rs72926932	TCF4	18	53050646	C	A	0.08	0.04	0.004	2.3e-10	0.000123816	99.9998
rs73226260	HNF1A	12	121380541	G	A	0.97	0.05	0.01	1.6e-08	3.09568e-05	24.9999
rs738408	PNPLA3	22	44324730	T	C	0.23	0.02	0.004	1.7e-09	3.09568e-05	24.9999
rs74653713	MBNL1	3	152417881	C	A	0.96	0.05	0.01	1.5e-09	3.09568e-05	24.9999
rs76011118	CDKN2A/B	9	22133773	A	G	0.03	0.09	0.009	6.8e-18	0.000123816	99.9998
rs7669833	TMEM154	4	153513369	T	A	0.7	0.02	0.004	5.8e-11	3.09568e-05	24.9999
rs76895963	CCND2	12	4384844	T	G	0.98	0.2	0.014	4.8e-53	0.000252652	204.081
rs77464186	CENTD2/ARAP1	11	72460398	A	C	0.84	0.05	0.004	7.6e-27	0.000193448	156.25
rs7756992	CDKAL1	6	20679709	G	A	0.27	0.06	0.002	1e-64	0.00111324	899.998
rs78025551	TCF7L2	10	114757956	C	G	0.85	0.07	0.006	9.9e-54	0.000168519	136.111
rs78408340	PAM	5	102338739	G	C	0.01	0.17	0.019	5.3e-18	9.91235e-05	80.0552
rs7903146	TCF7L2	10	114758349	T	C	0.3	0.14	0.005	1e-200	0.000969893	783.998
rs79687284	PROX1	1	214150821	C	G	0.03	0.08	0.009	4.3e-19	9.78321e-05	79.0121
rs80147536	THADA	2	43698028	A	T	0.9	0.06	0.006	3.8e-25	0.000123816	99.9998
rs8032939	RASGRP1	15	38834033	C	T	0.25	0.02	0.002	3.6e-08	0.000123816	99.9998
rs8107974	TM6SF2	19	19388500	T	A	0.08	0.05	0.006	8.7e-15	8.59863e-05	69.4443
rs862320	NFAT5	16	69651866	C	T	0.58	0.02	0.004	1.3e-12	3.09568e-05	24.9999
rs878521	GCK	7	44255643	A	G	0.25	0.03	0.004	2.8e-11	6.965e-05	56.2499
rs9379084	RREB1	6	7231843	G	A	0.89	0.05	0.004	5.6e-20	0.000193448	156.25
rs9563615	SRGAP2D	13	59077406	A	T	0.71	0.02	0.004	9.8e-10	3.09568e-05	24.9999
rs9569864	PCDH17	13	58965435	C	T	0.82	0.03	0.004	9.7e-10	6.965e-05	56.2499
rs9687832	ANKRD55	5	55861595	A	G	0.2	0.03	0.004	2.2e-12	6.965e-05	56.2499
rs9860730	ADAMTS9	3	64701146	A	G	0.7	0.03	0.002	1e-11	0.000278542	224.999
rs9873618	SLC2A2	3	170733076	G	A	0.71	0.03	0.002	1.2e-15	0.000278542	224.999
rs10406327#	PEPD	19	33890838	C	G	0.52	0.02	0.004	3.3e-09
rs10908278#	HNF1B	17	36099952	T	A	0.48	0.03	0.004	1.3e-25
rs11967262#	VEGFA	6	43760327	G	C	0.49	0.02	0.004	3.5e-09
rs1796330#	TSPAN8/LGR5	12	71522953	G	C	0.57	0.02	0.004	2.5e-11
rs6070625#	GNAS	20	57394628	G	C	0.52	0.02	0.004	5.1e-12
rs703972#	ZMIZ1	10	80952826	G	C	0.53	0.03	0.002	1.9e-24
rs8037894#	C2CD4A/B	15	62394264	G	C	0.57	0.02	0.002	1.7e-09
rs11257655*	RN7SL232P	10	12307894	T	C	0.22	0.04	0.004	3.8e-24
rs4977213*	BOP1	8	145507304	C	T	0.37	0.02	0.004	6.6e-12
rs96844*	MAP3K1	5	56196604	G	A	0.26	0.02	0.002	2.8e-08
Total										0.0239301	103.093
IV, instrumental variable; T2D, type 2 diabetes; Chr, chromosome; EA, effect allele;NEA, non-effect allele; EAF, effect allele frequency; SE, standard error; SNP, single nucleotide polymorphism.
aR2 were calculated using the following formula: (2×EAF×(1-EAF)×beta2)/[(2×EAF×(1-EAF)×beta2) + (2×EAF×(1-EAF)×N×SE2)], where EAF is the effect allele frequency, beta is the estimated effect on type 2 diabetes, Ν is the sample size of the GWAS for the SNP-type 2 diabetes association and SE is the standard error of the estimated effect.
bF-statistic were calculated using the following formula: R2(N-2)/(1-R2), where R2 is the proportion of variance in type 2 diabetes explained by each instrument and N is the sample size of the GWAS for the SNP-type 2 diabetes association.
#Removing the SNPs for being palindromic with intermediate allele frequencies.
*Removing the SNPs that showed pleiotropic associations at genome-wide significance (p<5 × 10-8).
Supplementary Table 2 Characteristics of the SNPs used as IVs for fasting glucose in the MR analysis.
SNP	Nearest gene	Chr	Position	EA	NEA	EAF	Beta	SE	P-value	R2a	F-statisticb
rs11603334	ARAP1	11	72432985	G	A	0.83	0.025	0.004	4.4e-11	0.000672181	39.0612
rs13179048	PCSK1	5	95542726	C	A	0.69	0.021	0.003	1.6e-09	0.00084304	48.9983
rs1371614	DPYSL5	2	27152874	T	C	0.25	0.02	0.004	2.9e-09	0.0004303	24.9991
rs1483121	OR4S1	11	48333360	G	A	0.86	0.027	0.005	6.5e-08	0.000501866	29.159
rs2293941	PDX1	13	28491198	A	G	0.22	0.022	0.004	1.3e-08	0.000520616	30.249
rs4841132	PPP1R3B	8	9183596	A	G	0.1	0.026	0.005	7.9e-07	0.000465396	27.0391
rs6048205	FOXA2	20	22559601	A	G	0.95	0.044	0.007	7.1e-10	0.00067988	39.5088
Total										0.00411328	34.2612
IV, instrumental variable; Chr, chromosome; EA, effect allele;NEA, non-effect allele; EAF, effect allele frequency; SE, standard error; SNP, single nucleotide polymorphism.
aR2 were calculated using the following formula:(2×EAF×(1-EAF)×beta2)/[(2×EAF×(1-EAF)×beta2) + (2×EAF×(1-EAF)×N×SE2)], where EAF is the effect allele frequency, beta is the estimated effect on faasting glucose, Ν is the sample size of the GWAS for the SNP-fasting glucose association and SE is the standard error of the estimated effect.
bF-statistic were calculated using the following formula: R2(N-2)/(1-R2), where R2 is the proportion of variance in fasting glucose explained by each instrument and N is the sample size of the GWAS for the fasting glucose association.
Supplementary Table 3 Characteristics of the SNPs used as IVs for fasting insulin in the MR analysis.
SNP	Nearest gene	Chr	Position	EA	NEA	EAF	Beta	SE	P-value	R2a	F-statisticb
rs2785980	RP11-95P13.2	1	219700519	T	C	0.67	0.016	0.003	7.7e-08	0.000549349	28.4433
rs4646949	UHRF1BP1	6	34845449	T	G	0.75	0.016	0.003	5.9e-08	0.000549349	28.4433
rs7607980	COBLL1	2	165551201	T	C	0.88	0.021	0.004	6.1e-14	0.000532325	27.5614
rs4841132	RP11-115J16.1	8	9183596	A	G	0.1	0.02	0.004	1.4e-07	0.000482859	24.999
rs4691380	PDGFC	4	157720124	C	T	0.67	0.016	0.003	1.5e-08	0.000549349	28.4433
rs2943634	IRS1	2	227068080	C	A	0.66	0.018	0.003	1.7e-12	0.000695169	35.9986
Total										0.0033584	29.0599
IV, instrumental variable; Chr, chromosome; EA, effect allele; NEA, non-effect allele; EAF, effect allele frequency; SE, standard error; SNP, single nucleotide polymorphism.
aR2 were calculated using the following formula: (2×EAF×(1-EAF)×beta2)/[(2×EAF×(1-EAF)×beta2) + (2×EAF×(1-EAF)×N×SE2)], where EAF is the effect allele frequency, beta is the estimated effect on fasting insulin, Ν is the sample size of the GWAS for the SNP-fasting insulin association and SE is the standard error of the estimated effect.
bF-statistic were calculated using the following formula: R2(N-2)/(1-R2), where R2 is the proportion of variance in fasting glucose explained by each instrument and N is the sample size of the GWAS for the fasting glucose association.
Supplementary Table 4 Characteristics of the SNPs used as IVs for HbA1C in the MR analysis.
SNP	Nearest gene	Chr	Position	EA	NEA	EAF	Beta	SE	P-value	R2a	F-statisticb
rs267738	CERS2	1	150940625	T	C	0.3162	0.028	0.0017	4.46e-64	0.00218887	271.276
rs857691	SPTA1	1	158626378	G	A	0.5056	0.009	0.0016	1.46e-08	0.000255792	31.6401
rs17509001	ATAD2B	2	24021231	A	G	0.7223	0.033	0.0021	1.68e-55	0.00199286	246.935
rs12621844	AC079807.4	2	48414735	G	C	0.2938	0.02	0.002	2.23e-23	0.000807983	99.9984
rs560887	G6PC2	2	169763148	T	C	0.647	0.014	0.0019	2.56e-14	0.000438845	54.2928
rs7616006	LINC00690	3	12267648	T	C	0.7415	0.021	0.0024	7.45e-18	0.000618729	76.5613
rs9818758	USP4	3	49382925	A	G	0.6745	0.015	0.0017	1.38e-19	0.000629165	77.8534
rs11708067	ADCY5	3	123065778	G	A	0.815	0.012	0.0021	6.85e-09	0.000263975	32.6525
rs8192675	SLC2A2	3	170724883	A	G	0.7542	0.013	0.0019	1.42e-12	0.000378415	46.8136
rs13134327	RP13-578N3.3	4	144659795	A	G	0.5666	0.01	0.0016	6.38e-10	0.000315774	39.0619
rs7756992	CDKAL1	6	20679709	T	C	0.5999	0.01	0.0018	1.87e-08	0.000249517	30.8637
rs1800562	HFE	6	26093141	A	G	0.3335	0.013	0.0017	2.64e-15	0.000472647	58.4766
rs198846	HIST1H1T	6	26107463	A	T	0.4128	0.01	0.0019	3.27e-08	0.000223949	27.7004
rs11964178	CCDC162P	6	109562035	C	T	0.1576	0.018	0.0023	1.94e-15	0.000495025	61.2466
rs1154792	snoU13	7	52476323	A	G	0.2428	0.015	0.0022	5.27e-12	0.000375774	46.4869
rs592423	AL356739.1	6	139840693	C	T	0.2489	0.015	0.0023	6.12e-11	0.00034382	42.5324
rs4607517	YKT6	7	44235668	G	A	0.9279	0.04	0.0036	4.67e-28	0.000997321	123.455
rs3824065	YKT6	7	44247258	G	A	0.8293	0.022	0.0022	1.18e-23	0.000807983	99.9984
rs6474359	ANK1	8	41549194	T	C	0.1097	0.015	0.0028	4.44e-08	0.000232017	28.6985
rs4737009	ANK1	8	41630405	A	G	0.7992	0.014	0.0021	7.04e-12	0.000359265	44.4437
rs6980507	SLC20A2	8	42383084	T	G	0.5039	0.012	0.0016	1.42e-15	0.000454651	56.2491
rs11558471	SLC30A8	8	118185733	T	G	0.7701	0.011	0.0019	2.59e-09	0.000270965	33.5175
rs2383208	CDKN2B-AS1	9	22132076	G	A	0.1513	0.019	0.0027	1.7e-12	0.000400275	49.5191
rs7040409	PCNPP2	9	91503236	C	A	0.3205	0.013	0.002	1.51e-10	0.000341532	42.2493
rs579459	ABO	9	136154168	C	T	0.5557	0.019	0.0016	4.22e-35	0.001139	141.013
rs4745982	HK1	10	71089843	A	G	0.2017	0.031	0.0024	8.76e-38	0.00134731	166.838
rs10823343	HK1	10	71091013	A	G	0.2531	0.021	0.002	4.48e-27	0.000890727	110.248
rs17747324	TCF7L2	10	114752503	T	G	0.8726	0.095	0.0056	2.87e-65	0.00232175	287.782
rs3782123	BET1L	11	205198	G	A	0.4606	0.016	0.0017	1.4e-22	0.000715788	88.5799
rs11603334	ARAP1	11	72432985	C	T	0.6843	0.028	0.0018	1.48e-58	0.00195288	241.971
rs10830963	MTNR1B	11	92708710	C	T	0.2389	0.011	0.0019	9.42e-09	0.000270965	33.5175
rs2110073	PHB2	12	7075882	A	C	0.4566	0.009	0.0017	3.96e-08	0.000226591	28.0272
rs2408955	PFKM	12	48499131	T	C	0.953	0.044	0.0053	1.5e-16	0.000557012	68.9202
rs10774625	ATXN2	12	111910219	A	G	0.4014	0.01	0.0018	3.58e-08	0.000249517	30.8637
rs282587	ATP11A	13	113351662	C	G	0.8953	0.028	0.0037	2.56e-14	0.000462876	57.2672
rs9604573	GAS6	13	114542858	A	G	0.5744	0.01	0.0017	5.07e-10	0.000279727	34.6015
rs11248914	FAM234A	16	293562	G	A	0.2862	0.012	0.0018	2.8e-12	0.000359265	44.4437
rs1558902	FTO	16	53803574	T	C	0.6906	0.011	0.0017	1.38e-11	0.000338449	41.8678
rs837763	PIEZO1	16	88853729	T	C	0.5548	0.017	0.0016	1.68e-28	0.000912042	112.889
rs9914988	ERAL1	17	27183104	T	C	0.2715	0.019	0.0019	3.97e-25	0.000807983	99.9984
rs1046896	FN3KRP	17	80685533	T	C	0.2738	0.01	0.0018	9.6e-09	0.000249517	30.8637
rs17533903	MYO9B	19	17256523	A	G	0.2028	0.012	0.002	7.74e-10	0.000291024	35.9994
rs4820268	TMPRSS6	22	37469591	A	G	0.7877	0.013	0.002	2.77e-11	0.000341532	42.2493
Total										0.0276291	81.6881
IV, instrumental variable; HbA1c, hemoglobinA1c; Chr, chromosome; EA, effect allele; NEA, non-effect allele; EAF, effect allele frequency; SE, standard error; SNP, single nucleotide polymorphism.
aR2 were calculated using the following formula: (2×EAF×(1-EAF)×beta2)/[(2×EAF×(1-EAF)×beta2) + (2×EAF×(1-EAF)×N×SE2)], where EAF is the effect allele frequency, beta is the estimated effect on HbA1C, Ν is the sample size of the GWAS for the SNP-HbA1C association and SE is the standard error of the estimated effect.
bF-statistic were calculated using the following formula: R2(N-2)/(1-R2), where R2 is the proportion of variance in HbA1C explained by each instrument and N is the sample size of the GWAS for the HbA1C association.
Supplementary Table 5 Characteristics of the SNPs used as IVs for fasting proinsulin in the MR analysis.
SNP	Nearest gene	Chr	Position	EA	NEA	EAF	Beta	SE	P-value	R2a	F-statisticb
rs10501320	MADD	11	47250375	C	G	0.72	-0.11	0.008	2.1e-45	0.017361	189.027
rs11558471	SLC30A8	8	118254914	A	G	0.69	0.057	0.0079	4.2e-13	0.00484132	52.0492
rs11603334	ARAP1	11	72110633	A	G	0.15	0.13	0.01	3.3e-38	0.0155474	168.968
rs1549318	LARP6	15	68896201	T	C	0.61	0.04	0.0074	8e-08	0.002723	29.2129
rs4502156	VPS13C	15	60170447	T	C	0.58	0.048	0.0072	3.8e-11	0.00413612	44.4361
rs4790333	SGSM2	17	2209453	T	C	0.45	0.04	0.0071	2.2e-08	0.00295728	31.7338
rs6235	PCSK1	5	95754654	G	C	0.28	0.058	0.0078	7.7e-14	0.00514049	55.2822
rs7903146	TCF7L2	10	114748339	T	C	0.3	0.067	0.0077	3.5e-18	0.00702557	75.6984
Total										0.0597322	84.9035
IV, instrumental variable; Chr, chromosome; EA, effect allele; NEA, non-effect allele; EAF, effect allele frequency; SE, standard error; SNP, single nucleotide polymorphism.
aR2 were calculated using the following formula: (2×EAF×(1-EAF)×beta2)/[(2×EAF×(1-EAF)×beta2) + (2×EAF×(1-EAF)×N×SE2)], where EAF is the effect allele frequency, beta is the estimated effect on fasting proinsulin, Ν is the sample size of the GWAS for the SNP-fasting proinsulin association and SE is the standard error of the estimated effect.
bF-statistic were calculated using the following formula: R2(N-2)/(1-R2), where R2 is the proportion of variance in fasting proinsulin explained by each instrument and N is the sample size of the GWAS for the fasting proinsulin association.
Supplementary Table 6 Characteristics of the SNPs used as IVs for FEV1 in the MR analysis.
SNP	Nearest gene	Chr	Position	EA	NEA	EAF	Beta	SE	P-value	R2a	F-statisticb
rs10041013	LINC02201	5	122033547	T	C	0.361137	-0.0122047	0.00198544	7.90005e-10	0.000109304	37.7866
rs1012242	TASP1	20	13516711	C	T	0.684943	0.0118291	0.00205636	8.79995e-09	9.57212e-05	33.0904
rs10141786	VRTN	14	74817418	G	A	0.596814	-0.0133655	0.00194983	7.10068e-12	0.000135913	46.9866
rs10202052	NOP58	2	203136519	T	G	0.242665	-0.0123966	0.00221388	2.1e-08	9.06989e-05	31.3541
rs10283100	ENPP2	8	120596023	G	A	0.944419	0.0284972	0.00415913	7.29962e-12	0.000135795	46.9458
rs10461050	DLG1	3	196952171	C	A	0.274452	0.0141166	0.00213268	3.59998e-11	0.000126736	43.8133
rs1046934	TSEN15	1	184023529	C	A	0.346748	0.0117848	0.00199742	3.59998e-09	0.000100695	34.8099
rs10475282	SLC9A3	5	523995	A	G	0.267108	-0.0135469	0.00217209	4.49997e-10	0.000112517	38.8975
rs10771750	IPO8	12	30802761	C	A	0.515961	0.0125676	0.00190417	4.10015e-11	0.000126004	43.5603
rs10888385	ENSA	1	150574302	C	T	0.565972	-0.0146302	0.00191854	2.39994e-14	0.000168202	58.1509
rs11049381	CCDC91	12	28315040	A	G	0.564411	0.0151056	0.00192207	3.90032e-15	0.000178651	61.7639
rs11062596	-	12	3367761	T	A	0.091815	0.0207276	0.00330125	3.40001e-10	0.000114035	39.422
rs11075744	WWP2	16	69909115	A	G	0.5726	-0.019559	0.00192479	2.90001e-24	0.000298636	103.258
rs11085744	QTRT1	19	10819967	T	C	0.559294	-0.0151454	0.00192751	3.90032e-15	0.000178581	61.7399
rs11107119	SOCS2	12	93983132	A	T	0.219837	0.0213714	0.00230145	1.59993e-20	0.000249402	86.2304
rs11118683	C1orf140	1	221473248	T	C	0.421183	0.0113113	0.00194982	6.59994e-09	9.73505e-05	33.6538
rs111251222	MXD3	5	176735612	G	A	0.259175	0.0148593	0.00218122	9.60064e-12	0.000134241	46.4083
rs11191243	PITX3	10	103993035	A	G	0.204211	0.0132874	0.00236193	1.79999e-08	9.15484e-05	31.6478
rs112759862	PIEZO1	16	88814210	A	G	0.172195	-0.0173934	0.00252943	6.09958e-12	0.000136776	47.2848
rs1129012	-	20	30915461	C	T	0.171465	-0.0143945	0.00252928	1.29999e-08	9.36922e-05	32.3889
rs113252144	POLG2	17	62483931	T	C	0.076401	0.0271476	0.00364788	9.8992e-14	0.000160198	55.3834
rs11651123	CASC17	17	69147591	A	G	0.479904	-0.016707	0.00190365	1.69981e-18	0.000222777	77.023
rs11689727	DNMT3A	2	25458100	A	C	0.331636	-0.0113188	0.0020217	2.19999e-08	9.06719e-05	31.3448
rs11698277	RP1-66N13.4	20	45502865	T	C	0.320117	0.0138685	0.00205035	1.29987e-11	0.00013234	45.751
rs11707746	ADCY5	3	123068817	C	T	0.287497	-0.0142053	0.00211462	1.80011e-11	0.000130534	45.1267
rs11732618	CPE	4	166336558	A	G	0.332646	0.0118359	0.0020218	4.79999e-09	9.91352e-05	34.2708
rs117372259	CREB3L1	11	46304187	G	A	0.03131	0.032342	0.00573608	1.7e-08	9.19619e-05	31.7908
rs11764404	AC006026.9	7	23587160	T	C	0.270963	-0.0164787	0.00214649	1.59993e-14	0.000170474	58.9367
rs11784052	MFHAS1	8	8671962	T	C	0.459741	-0.0121489	0.00191424	2.19999e-10	0.000116513	40.279
rs1187115	KRT18P9	6	34172055	A	C	0.830365	-0.0282792	0.00253353	6.29941e-29	0.000360305	124.589
rs11909473	AP000472.3	21	16547435	G	A	0.289527	0.0120516	0.002111	1.09999e-08	9.42794e-05	32.592
rs11938781	LCORL	4	17924734	C	T	0.165293	-0.0341123	0.00256917	3.10027e-40	0.000509753	176.292
rs11967850	TIAM2	6	155451722	T	C	0.203063	-0.0132895	0.00236271	1.89998e-08	9.15169e-05	31.6369
rs12036042	PIK3C2B	1	204469314	C	T	0.191572	0.0157314	0.00241344	7.10068e-11	0.0001229	42.4873
rs12216687	C1GALT1	7	7189762	A	G	0.187013	0.0142617	0.00246796	7.49998e-09	9.65982e-05	33.3936
rs1240293	MYRFL	12	70278895	A	T	0.575182	0.0108601	0.00193714	2.1e-08	9.09182e-05	31.4299
rs12441130	LOXL1	15	74234902	C	T	0.484927	-0.018589	0.0019053	1.69981e-22	0.000275303	95.1881
rs1247940	RP11-139B1.1	12	114682651	C	T	0.435179	0.0120578	0.00191641	3.09999e-10	0.000114513	39.5874
rs12571363	HTRA1	10	124230612	A	C	0.107049	-0.0230799	0.00308212	7.00003e-14	0.000162197	56.0746
rs12631704	RSRC1	3	158177751	G	A	0.249295	-0.0169275	0.00219514	1.20005e-14	0.000172001	59.4646
rs12684650	QSOX2	9	139110654	T	C	0.31694	-0.0187927	0.00204657	4.19952e-20	0.000243873	84.3185
rs12698403	RP11-362B23.1	7	156127246	A	G	0.440812	-0.0154763	0.00192368	8.60003e-16	0.000187211	64.7241
rs12894780	ITPK1	14	93503386	C	T	0.126409	-0.021822	0.00287975	3.50026e-14	0.000166093	57.4218
rs12924903	FBXL19-AS1	16	30928970	G	A	0.645378	0.0141441	0.00199117	1.20005e-12	0.000145954	50.4582
rs13042148	PXMP4	20	32298286	T	C	0.155527	-0.0198749	0.00263221	4.30031e-14	0.000164908	57.012
rs13245206	HDAC9	7	18891259	A	G	0.368521	-0.0120313	0.00198269	1.29999e-09	0.000106516	36.8225
rs140988776	SKI	1	2197233	T	C	0.071068	-0.0262567	0.00370881	1.39991e-12	0.000144975	50.1197
rs1415701	L3MBTL3	6	130345835	A	G	0.268205	-0.0237069	0.00217446	1.10002e-27	0.000343749	118.862
rs147110934	ZNF628	19	55993436	T	G	0.024219	-0.0487178	0.00619462	3.69999e-15	0.000178901	61.8505
rs1474647	WNT4	1	22441865	T	C	0.551114	-0.014368	0.00191188	5.70033e-14	0.00016336	56.4766
rs147568678	PCGF5	10	93061851	C	T	0.237878	0.0154813	0.0022447	5.30029e-12	0.000137589	47.5659
rs1490384	RP11-394G3.2	6	126851160	T	C	0.499873	0.0208784	0.0019009	4.60045e-28	0.000348874	120.635
rs1516890	LINC01505	9	108989399	A	G	0.470163	-0.0123911	0.00191883	1.09999e-10	0.000120625	41.7008
rs1530555	ACMSD	2	135599739	T	C	0.373576	0.0139018	0.00196103	1.39991e-12	0.000145363	50.2541
rs1555211	RP11-1042B17.3	14	61025791	T	C	0.292064	0.0122816	0.00209694	4.70002e-09	9.92292e-05	34.3033
rs1573891	RP11-35O15.1	15	99186488	C	G	0.15848	-0.0179646	0.0026235	7.50067e-12	0.000135631	46.8889
rs1668091	RP11-449D8.5	18	22290711	C	T	0.317741	0.0117234	0.00205713	1.2e-08	9.3948e-05	32.4774
rs16843629	NOP14	4	2946481	G	A	0.304296	0.0122699	0.00206834	2.99999e-09	0.000101798	35.1913
rs1701704	IKZF4	12	56412487	G	T	0.342131	-0.0141463	0.00200336	1.59993e-12	0.000144228	49.8615
rs17109082	LINC01362	1	83236757	G	A	0.3321	-0.011443	0.00202374	1.6e-08	9.24857e-05	31.9719
rs17232687	AC092657.2	7	46448518	C	T	0.50406	0.013496	0.00190583	1.39991e-12	0.000145052	50.1463
rs17400325	PDE11A	2	178565913	C	T	0.04143	0.0332241	0.00476722	3.19963e-12	0.000140495	48.5706
rs17448715	CSE1L	20	47691743	T	C	0.247221	0.0179415	0.0022076	4.40048e-16	0.000191046	66.0502
rs17721822	CASC20	20	6469596	A	G	0.360828	-0.0119902	0.00198921	1.7e-09	0.000105097	36.332
rs17855988	ELN	7	73474825	C	G	0.098682	0.0195851	0.00324415	1.6e-09	0.000105426	36.4458
rs17884312	UHRF1	19	4911796	T	C	0.181275	0.0152416	0.00249131	9.49992e-10	0.000108269	37.4286
rs1805155	PTCH1	9	98238379	G	A	0.107735	0.0181396	0.00306845	3.40001e-09	0.000101092	34.9474
rs1829935	RNU6-461P	3	98796510	G	A	0.250508	-0.0182972	0.00219854	8.60003e-17	0.000200336	69.2625
rs183587141	NEU2	2	227368066	T	C	0.016428	-0.0557818	0.00762411	2.49977e-13	0.00015484	53.5309
rs1867265	CHRM3	1	239840107	T	C	0.384313	-0.0121502	0.0019637	6.1e-10	0.000110742	38.2837
rs1991431	ZBTB38	3	141133450	A	G	0.44202	0.0142059	0.00191732	1.29987e-13	0.00015879	54.8966
rs2079147	CDK6	7	92332375	G	A	0.539174	-0.0127624	0.001926	3.40017e-11	0.000127011	43.9086
rs2099364	RP11-495L19.1	9	23588830	C	T	0.46241	0.0133768	0.00191384	2.80027e-12	0.000141311	48.8529
rs2149109	-	10	94917819	A	G	0.413989	-0.0113676	0.00196822	7.69999e-09	9.64924e-05	33.3571
rs2167734	AC105242.1	8	78110704	A	G	0.284733	0.012838	0.00211331	1.2e-09	0.00010675	36.9034
rs2219320	HMGN2	1	26803430	C	T	0.253846	-0.0172918	0.00218332	2.39994e-15	0.000181431	62.7254
rs225646	VTA1	6	142482284	A	G	0.757087	0.0170811	0.00221974	1.39991e-14	0.000171276	59.2141
rs2294214	CASC15	6	22056923	C	A	0.31602	-0.0177042	0.00204279	4.40048e-18	0.000217248	75.1108
rs2412771	DPP3P1	4	57761417	C	T	0.417231	0.0142441	0.00194764	2.60016e-13	0.000154714	53.4872
rs2526625	HDAC9	7	19043360	C	A	0.749004	-0.0191888	0.00220927	3.80014e-18	0.000218197	75.4389
rs2532111	SCN4A	17	62017421	G	A	0.639522	0.021257	0.00199984	2.19989e-26	0.00032675	112.982
rs2544535	LINC01804	2	15906778	C	T	0.512063	0.0151634	0.00190493	1.69981e-15	0.000183274	63.3625
rs2579762	C10orf11	10	78318879	C	A	0.472082	-0.0169713	0.00190568	5.30029e-19	0.00022939	79.31
rs2678408	AC018717.1	2	199713224	C	T	0.462772	-0.0140111	0.00191299	2.39994e-13	0.000155166	53.6434
rs2740510	DLEU1	13	50737520	A	G	0.084925	-0.018893	0.00344768	4.30002e-08	8.6867e-05	30.0293
rs2812208	DLEU1	13	50707087	C	G	0.020822	0.0845939	0.00668196	9.79941e-37	0.000463461	160.276
rs2833	ZHX2	8	123986649	G	A	0.442768	0.0120105	0.00191985	4e-10	0.00011321	39.1368
rs28361039	C4B	6	31978746	A	G	0.644017	-0.0199942	0.00210485	2.09991e-21	0.000260974	90.2326
rs28391281	INPP5B	1	38408974	C	T	0.457636	-0.0125835	0.00190803	4.30031e-11	0.000125812	43.4941
rs2885697	SCMH1	1	41544279	T	G	0.664977	-0.018566	0.00201282	2.90001e-20	0.000246073	85.0794
rs2929525	MYO9A	15	72287856	A	G	0.73431	-0.0130152	0.0021601	1.7e-09	0.000105015	36.3037
rs2974389	LINC00620	3	13787641	G	A	0.574868	-0.0147846	0.00192687	1.69981e-14	0.000170288	58.8724
rs3019022	RP11-643G5.6	11	89309080	C	A	0.448811	-0.0106129	0.00191872	3.2e-08	8.85016e-05	30.5944
rs30232	MIR193BHG	16	14401962	A	G	0.58244	0.0109233	0.0019295	1.5e-08	9.27091e-05	32.0491
rs3138499	GADD45G	9	92219921	C	A	0.518501	-0.0143886	0.00192201	7.10068e-14	0.000162106	56.0432
rs3253	THBS2	6	169616112	T	C	0.313752	0.0133123	0.00205292	8.9002e-11	0.000121634	42.0494
rs34158769	ZFP57	6	26336572	A	G	0.106015	-0.0262975	0.0031076	2.60016e-17	0.000207125	71.6104
rs34712979	NPNT	4	106819053	A	G	0.256632	-0.0318069	0.00217894	2.90001e-48	0.000616069	213.083
rs35943760	RP11-333I13.1	2	47011755	T	A	0.468552	0.0109379	0.00191258	1.09999e-08	9.46089e-05	32.7059
rs36226649	NFATC4	14	24835500	C	T	0.06682	0.0279309	0.00381723	2.49977e-13	0.000154864	53.5391
rs367805	SLC22A5	5	131701279	C	T	0.697379	0.0113796	0.00207037	3.89996e-08	8.73906e-05	30.2103
rs3757230	CD164	6	109704442	C	T	0.410117	-0.0163309	0.00193357	2.99985e-17	0.000206327	71.3342
rs3761123	ZGPAT	20	62342468	A	G	0.673552	-0.0129095	0.00203039	2e-10	0.000116937	40.4257
rs3791679	EFEMP1	2	56096892	G	A	0.226394	-0.0320527	0.00226923	2.70023e-45	0.000576854	199.512
rs4121165	MIGA1	1	78276977	A	G	0.211194	-0.0172005	0.00233146	1.59993e-13	0.000157435	54.4282
rs41281623	MTMR3	22	30424256	A	G	0.089302	0.0275471	0.00334133	1.69981e-16	0.000196595	67.9689
rs41311445	SNU13	22	42070374	C	A	0.096051	-0.0206198	0.00323756	1.89998e-10	0.000117335	40.5631
rs425102	AP3B1	5	77396400	G	T	0.240872	-0.0152773	0.00222186	6.20012e-12	0.000136756	47.2778
rs4284505	MIR17HG	13	92001472	G	A	0.605405	-0.011826	0.00195063	1.29999e-09	0.000106322	36.7556
rs4320932	INS-IGF2	11	2171601	C	T	0.185208	-0.0164176	0.00246682	2.80027e-11	0.000128125	44.2937
rs4331881	ADAM19	5	156944475	T	G	0.342016	-0.0152195	0.00200638	3.29989e-14	0.000166436	57.5403
rs4478172	AFAP1	4	7902003	C	A	0.261648	-0.0140473	0.00217097	9.79941e-11	0.000121107	41.8674
rs4511740	STK25	2	239865055	G	A	0.225749	0.0180431	0.00227448	2.09991e-15	0.000182022	62.9297
rs4667585	CERS6	2	169487668	C	A	0.749712	-0.0129187	0.00219686	4.09996e-09	0.000100031	34.5804
rs4700662	AC010376.1	5	64392906	T	C	0.664297	0.0118929	0.00202737	4.49997e-09	9.9543e-05	34.4118
rs4733728	MTRF1LP2	8	130731563	A	C	0.489236	-0.0167869	0.00191061	1.50003e-18	0.000223277	77.1959
rs4836528	LMNB1	5	122652493	C	T	0.409354	-0.0172744	0.00195382	9.49948e-19	0.000226091	78.169
rs4909912	ZFAT	8	135572297	T	C	0.42623	-0.0141408	0.00192894	2.29985e-13	0.000155449	53.7413
rs513953	MTCL1	18	8801351	G	A	0.74484	0.0190463	0.00219144	3.59998e-18	0.00021848	75.537
rs516451	CTD-2197M16.1	5	32851259	T	C	0.381223	0.010781	0.0019709	4.49997e-08	8.65557e-05	29.9217
rs520461	RP11-50B3.2	11	126047425	G	A	0.221478	-0.0143925	0.00229659	3.69999e-10	0.000113606	39.2738
rs56218291	AL359546.1	10	31358692	G	T	0.192426	0.0145855	0.00242273	1.7e-09	0.000104841	36.2435
rs56291455	DCC	18	50830973	A	C	0.384818	-0.0108745	0.00196334	2.99999e-08	8.87429e-05	30.6779
rs56332326	AFF3	2	100573355	C	T	0.13536	-0.0166623	0.00278172	2.1e-09	0.000103787	35.879
rs571799	SUZ12	17	30292174	T	A	0.186854	0.0167693	0.00249465	1.80011e-11	0.000130707	45.1864
rs5742643	IGF1	12	102837863	C	T	0.752975	-0.0147422	0.0021925	1.80011e-11	0.000130778	45.2109
rs6107892	RP5-971N18.3	20	6883596	A	G	0.302245	0.0113857	0.00208195	4.49997e-08	8.65139e-05	29.9072
rs61966248	KLF5	13	73626127	C	T	0.171493	-0.0142287	0.00253375	2e-08	9.12237e-05	31.5355
rs62088172	SERPINF1	17	1666253	T	C	0.352274	0.0118562	0.00200619	3.40001e-09	0.000101029	34.9256
rs62126405	KCNS3	2	18303119	G	A	0.142992	0.0229085	0.00272589	4.30031e-17	0.000204283	70.6275
rs62175435	ITGB6	2	161080801	G	A	0.428694	-0.010783	0.00193793	2.59998e-08	8.95589e-05	30.96
rs62275653	SPTSSB	3	156372135	T	C	0.051113	-0.0294801	0.00432797	9.70063e-12	0.000134207	46.3967
rs62621197	ADAMTS10	19	8670147	T	C	0.037006	-0.0623009	0.0052414	1.39991e-32	0.000408565	141.284
rs644570	HDAC9	7	18385738	A	G	0.632039	0.0116157	0.00198291	4.70002e-09	9.92627e-05	34.3149
rs6445932	SLMAP	3	57879611	G	T	0.247901	0.0160142	0.00220692	4.00037e-13	0.000152306	52.6544
rs6579167	ITCH	20	33032915	C	T	0.216289	0.0139841	0.0023369	2.19999e-09	0.000103583	35.8085
rs663378	BAMBI	10	28975214	A	G	0.833455	-0.0163103	0.00257932	2.59998e-10	0.000115667	39.9863
rs6671370	TGFB2	1	218597044	A	G	0.287477	0.0195543	0.00210078	1.29987e-20	0.000250587	86.6405
rs6686129	RP11-306I1.2	1	165591948	C	T	0.670681	-0.0113918	0.00203269	2.1e-08	9.08547e-05	31.408
rs6729308	TNS1	2	218694153	A	G	0.43987	-0.0163822	0.00192249	1.59993e-17	0.000210024	72.6129
rs6762578	COPG1	3	128992047	A	G	0.778514	0.0165621	0.00230073	6.09958e-13	0.000149892	51.8199
rs681397	OR5AZ1P	11	57682011	T	G	0.444083	0.0109203	0.00192116	1.29999e-08	9.34644e-05	32.3102
rs68168878	SCUBE2	11	9079092	A	G	0.211443	0.0133527	0.00233745	1.09999e-08	9.43968e-05	32.6325
rs6859171	ITGA1	5	52241438	T	C	0.209455	0.0146557	0.00234648	4.20001e-10	0.000112843	39.0101
rs6907284	EPB41L2	6	131183519	C	T	0.697241	-0.0124211	0.00208652	2.59998e-09	0.000102512	35.4383
rs6919321	TBC1D22B	6	33724004	A	G	0.607644	0.0108072	0.00195559	3.29997e-08	8.8344e-05	30.5399
rs6923431	LAMA2	6	129824754	C	A	0.7346	0.0136468	0.00213298	1.6e-10	0.000118408	40.9341
rs7068966	CDC123	10	12277992	T	C	0.513603	0.0216709	0.00190392	5.10035e-30	0.000374661	129.555
rs7075773	EGR2	10	64598621	T	C	0.411084	-0.0147076	0.00193918	3.29989e-14	0.000166387	57.5234
rs7086293	PPIF	10	81103247	C	T	0.478966	-0.0105582	0.00190598	2.99999e-08	8.87665e-05	30.686
rs7091346	SH3PXD2A	10	105608824	T	C	0.360759	-0.012998	0.00198414	5.70033e-11	0.000124136	42.9147
rs71427097	SEMA4C	2	97526963	T	C	0.02948	-0.032008	0.00572789	2.30001e-08	9.03302e-05	31.2266
rs71482070	MPPED2	11	30492057	A	T	0.113039	-0.0169785	0.00305763	2.80001e-08	8.91938e-05	30.8337
rs71490394	EML3	11	62370155	A	G	0.371116	0.0149984	0.00197373	2.99985e-14	0.000167027	57.7447
rs7208573	MIR4734	17	36852997	G	T	0.389433	-0.0123639	0.00195775	2.69998e-10	0.000115369	39.8836
rs723588	BCKDHB	6	81056634	C	T	0.142713	0.0202185	0.00271457	9.49948e-14	0.000160461	55.4745
rs72613804	RP11-111J6.2	2	18691602	C	G	0.224745	0.0128374	0.00228105	1.79999e-08	9.16198e-05	31.6725
rs72643433	EBF1	5	158364449	A	G	0.252393	-0.0165423	0.00219806	5.19996e-14	0.000163827	56.6383
rs72666766	C8orf34	8	69580612	G	A	0.181625	-0.0140038	0.00247093	1.40001e-08	9.29127e-05	32.1195
rs72721197	DNM3	1	172271162	T	C	0.213272	0.0183774	0.00232103	2.39994e-15	0.000181331	62.6908
rs72755233	ADAMTS17	15	100692953	A	G	0.112197	-0.0314851	0.00301272	1.50003e-25	0.000315864	109.217
rs72907878	LINC01876	2	157083697	A	G	0.134864	-0.0247893	0.00278843	6.09958e-19	0.000228588	79.0326
rs72976986	ZBTB7A	19	4050424	A	G	0.1904	0.0137877	0.00244831	1.79999e-08	9.17393e-05	31.7138
rs73175572	IGF2BP2	3	185490184	G	A	0.11138	0.0253383	0.00305663	1.10002e-16	0.000198759	68.7174
rs735830	DNASE1	16	3695354	A	G	0.208733	-0.0167696	0.00234307	8.19974e-13	0.000148168	51.2239
rs7359156	SLC25A21	14	37488610	G	A	0.209396	-0.0152011	0.00234905	9.70063e-11	0.000121132	41.8758
rs741593	WWOX	16	78232703	G	T	0.715439	-0.0125152	0.00212105	3.59998e-09	0.00010071	34.8154
rs75216331	LINC02050	3	72400260	A	G	0.237615	-0.0143233	0.00223842	1.6e-10	0.000118439	40.945
rs75301758	NNT	5	43678781	T	C	0.183934	-0.0144345	0.00245241	4e-09	0.000100212	34.6429
rs7546750	RALGPS2	1	178903327	A	G	0.312797	0.0131454	0.00206337	1.89998e-10	0.000117405	40.5874
rs7558918	ATAD2B	2	23997661	G	T	0.447697	0.0171248	0.00191251	3.40017e-19	0.000231893	80.1754
rs7663740	FHDC1	4	145468845	T	G	0.540083	0.0302173	0.00190693	1.50003e-56	0.00072589	251.096
rs76895963	CCND2	12	4384844	G	T	0.020669	0.0593123	0.00736864	8.30042e-16	0.000187404	64.7907
rs769657	MAML3	4	140877659	G	A	0.330668	0.0116833	0.00203022	8.70001e-09	9.57961e-05	33.1163
rs76993203	BOK	2	242498497	A	G	0.454692	-0.0173429	0.00191204	1.20005e-19	0.000237953	82.271
rs7707008	HMP19	5	170801952	T	C	0.1763	-0.0156128	0.00250172	4.39997e-10	0.000112663	38.9477
rs77156651	SUSD5	3	33263149	A	G	0.053981	-0.0252937	0.00421275	1.89998e-09	0.000104278	36.0488
rs7733410	HTR4	5	147856522	A	G	0.441962	0.0221221	0.00191531	7.39946e-31	0.000385791	133.405
rs7753558	TRMT11	6	117523471	A	C	0.634567	0.0119513	0.00198598	1.79999e-09	0.000104756	36.2141
rs78101726	MECOM	3	169295436	G	A	0.15272	-0.0235908	0.00264524	4.70002e-19	0.000230038	79.534
rs78304176	GSK3A	19	42740612	T	G	0.064507	-0.0256052	0.00390511	5.50047e-11	0.00012436	42.992
rs78378222	TP53	17	7571752	G	T	0.012306	0.0544636	0.00882473	6.80002e-10	0.000110181	38.0897
rs7870193	GLIS3	9	4136023	T	C	0.380776	-0.0159295	0.00196785	5.70033e-16	0.000189532	65.5266
rs78956703	SPRED1	15	38553368	A	G	0.063282	-0.0221798	0.00390579	1.40001e-08	9.32828e-05	32.2474
rs79262430	PPP6R3	11	68366644	T	A	0.038301	-0.0307784	0.00498496	6.59994e-10	0.000110272	38.1212
rs79409628	FER	5	108113740	T	G	0.08378	0.0256072	0.00342906	8.19974e-14	0.000161305	55.7663
rs7952436	KDM2A	11	67024534	T	C	0.082207	-0.0405688	0.00346742	1.29987e-31	0.000395862	136.889
rs7968682	HMGA2	12	66371880	T	G	0.51781	-0.0238348	0.00191089	1e-35	0.000449884	155.578
rs79772576	-	17	44106220	G	A	0.225053	-0.0297221	0.00228037	7.8001e-39	0.000491224	169.881
rs8028898	THSD4	15	71679543	A	G	0.17465	-0.0162389	0.00251001	9.79941e-11	0.000121075	41.8562
rs8037367	ADAMTS17	15	100750871	C	T	0.292158	0.0127947	0.00210817	1.29999e-09	0.000106548	36.8338
rs803909	ASTN2	9	119413447	G	T	0.536759	-0.01611	0.00190731	2.99985e-17	0.00020635	71.3421
rs820077	ANKS1A	6	35033854	A	G	0.79852	0.0267935	0.00237042	1.29987e-29	0.000369481	127.763
rs841216	ANKS3	16	4746829	G	A	0.560183	-0.0113175	0.00192474	4.09996e-09	0.000100013	34.5744
rs879098	TMEM14C	6	2507448	G	A	0.399099	-0.0109298	0.00194706	2e-08	9.1153e-05	31.5111
rs879394	SLC2A2	3	168709843	T	G	0.234177	-0.0206293	0.00225543	5.90065e-20	0.000241963	83.6581
rs9295	CRIM1	2	36777825	A	G	0.295456	0.0133493	0.0020892	1.7e-10	0.0001181	40.8277
rs9310389	VGLL4	3	11687952	T	C	0.545547	0.0110687	0.00191821	7.90005e-09	9.63172e-05	33.2965
rs9322332	ESR1	6	152166801	A	C	0.455604	0.0139875	0.00191001	2.39994e-13	0.000155127	53.6298
rs9379084	RREB1	6	7231843	A	G	0.115471	-0.0191808	0.00306512	3.89996e-10	0.000113275	39.1594
rs9542595	LINC00348	13	71722247	A	G	0.308238	-0.0116828	0.00207305	1.7e-08	9.18711e-05	31.7594
rs984399	MEF2C-AS1	5	88381894	A	G	0.384569	-0.0111823	0.0019541	1e-08	9.47266e-05	32.7466
rs9884482	TET2	4	106081636	C	T	0.371501	0.0160207	0.00196792	3.90032e-16	0.000191694	66.2744
rs9886260	CCT4P1	7	140683398	A	G	0.72327	-0.0119204	0.00213313	2.30001e-08	9.03342e-05	31.228
rs9912553	ASPSCR1	17	79959703	G	C	0.723466	0.0213592	0.00212989	1.10002e-23	0.000290853	100.566
rs9970286	DENND2D	1	111737398	A	G	0.327091	0.0113333	0.00203102	2.39999e-08	9.0072e-05	31.1374
rs1011400#	ABLIM3	5	148611941	C	G	0.466383	-0.0116505	0.00190984	1.09999e-09
rs10490551#	EML4	2	42560388	A	T	0.276653	0.0155708	0.00212515	2.39994e-13
rs11621587#	RIN3	14	93098339	C	G	0.183954	0.0217856	0.00245436	6.90081e-19
rs12413039#	SEC24C	10	75524759	G	C	0.267943	0.0143763	0.00214548	2.09991e-11
rs12792817#	PRDM11	11	45202450	G	C	0.449277	-0.0105291	0.00192138	4.30002e-08
rs13101469#	LINC01091	4	124821733	T	A	0.197043	-0.0176406	0.00240014	1.99986e-13
rs17058252#	SCARA5	8	27774938	G	C	0.09033	-0.0186626	0.00332003	1.89998e-08
rs17099139#	BAG3	10	121419487	G	C	0.274619	-0.0126637	0.00214391	3.50002e-09
rs1786812#	CELF4	18	35086406	C	G	0.698193	0.0127955	0.00209401	9.90011e-10
rs1892525#	GNG12-AS1	1	68355614	C	G	0.29561	-0.0124853	0.002082	2e-09
rs2236610#	CLIC6	21	36060668	G	C	0.200112	-0.0145867	0.0023856	9.69996e-10
rs2284746#	MFAP2	1	17306675	G	C	0.522181	0.0133542	0.00190253	2.19989e-12
rs262827#	TULP4	6	158683646	T	A	0.336584	0.0153378	0.00201374	2.60016e-14
rs28446901#	ADAMTS13	9	136308796	G	C	0.154202	-0.0155462	0.00264967	4.39997e-09
rs34563869#	RP11-140I16.2	8	57151776	A	T	0.143456	-0.0261627	0.00275153	1.9002e-21
rs35506#	RP11-25E2.1	12	115500691	A	T	0.715326	0.0123073	0.00211572	5.99998e-09
rs3790141#	KIZ	20	21187315	G	C	0.433025	0.0105422	0.00192243	4.20001e-08
rs4800123#	RP11-863N1.4	18	20010241	G	C	0.41794	0.0108376	0.00194697	2.59998e-08
rs4909034#	TRIM71	3	32931120	G	C	0.332194	-0.0134478	0.00202103	2.90001e-11
rs5992930#	MICAL3	22	18452843	C	G	0.274638	0.0152859	0.00214005	9.09913e-13
rs60084210#	RP11-154H23.4	3	71681755	C	G	0.435576	0.0147433	0.001929	2.09991e-14
rs7162542#	ADAMTSL3	15	84514290	G	C	0.556314	0.0253456	0.00191623	6.09958e-40
rs7506068#	DYM	18	46884649	G	C	0.669591	0.0121685	0.00202654	1.89998e-09
rs7854962#	RP11-2B6.3	9	96900505	G	C	0.213042	-0.0183882	0.00234501	4.49987e-15
rs9701805#	FAF1	1	51356810	C	G	0.089393	0.0229873	0.00332993	5.10035e-12
rs7124681*	CELF1	11	47529947	A	C	0.408394	-0.0141192	0.0019326	2.80027e-13
rs9824092#	BSN	3	49674147	G	C	0.300373	0.0127832	0.00207315	7.00003e-10
Total										0.0338216	58.9902
IV, instrumental variable; FEV1, forced expiratory volume in 1; Chr, chromosome; EA, effect allele; NEA, non-effect allele; EAF, effect allele frequency; SE, standard error; SNP, single nucleotide polymorphism.
aR2 were calculated using the following formula: (2×EAF×(1-EAF)×beta2)/[(2×EAF×(1-EAF)×beta2) + (2×EAF×(1-EAF)×N×SE2)], where EAF is the effect allele frequency, beta is the estimated effect on FEV1, Ν is the sample size of the GWAS for the SNP-FEV1 association and SE is the standard error of the estimated effect.
bF-statistic were calculated using the following formula: R2(N-2)/(1-R2), where R2 is the proportion of variance in FEV1 explained by each instrument and N is the sample size of the GWAS for the FEV1 association.
#Removing the SNPs for being palindromic with intermediate allele frequencies.
*Removing the SNPs that showed pleiotropic associations at genome-wide significance (p<5 × 10-8).
Supplementary Table 7 Characteristics of the SNPs used as IVs for FVC in the MR analysis.
SNP	Nearest gene	Chr	Position	EA	NEA	EAF	Beta	SE	P-value	R2a	F-statisticb
rs10141786	VRTN	14	74817418	G	A	0.596814	-0.0148135	0.00184257	8.99912e-16	0.000186952	64.6346
rs10202701	NCL	2	232328681	T	C	0.542585	0.0130463	0.00180655	5.10035e-13	0.000150853	52.1522
rs10239195	KPNA7	7	98784835	C	G	0.286831	-0.0117797	0.00199119	3.29997e-09	0.000101238	34.9978
rs10283100	ENPP2	8	120596023	G	A	0.944419	0.0324873	0.00392878	1.39991e-16	0.000197775	68.3769
rs10410606	LTBP4	19	41108975	C	A	0.438436	0.0167752	0.00181538	2.49977e-20	0.000246966	85.3882
rs1046934	TSEN15	1	184023529	C	A	0.346748	0.0140332	0.00188515	9.79941e-14	0.000160286	55.4139
rs1054661	DOK7	4	3495941	C	T	0.342669	0.0112221	0.00189192	2.99999e-09	0.000101775	35.1836
rs10760999	ZNF367	9	99174951	A	G	0.170647	0.0168971	0.00239006	1.59993e-12	0.000144573	49.9809
rs10761495	ANK3	10	62171796	C	A	0.597627	0.0116541	0.00184038	2.39999e-10	0.000115994	40.0996
rs10789246	GNG12-AS1	1	68360969	C	T	0.300714	-0.0121853	0.00195552	4.60002e-10	0.000112317	38.828
rs10848442	ERC1	12	1237661	A	G	0.552335	0.0122708	0.0018111	1.20005e-11	0.000132785	45.9048
rs10861686	MTERF2	12	107383979	T	C	0.571988	-0.0104921	0.00181884	8e-09	9.62584e-05	33.2762
rs10866823	XPO7	8	21781629	T	C	0.55274	-0.0105612	0.00181666	6.1e-09	9.77645e-05	33.7969
rs10888385	ENSA	1	150574302	C	T	0.565972	-0.0182117	0.00181071	8.49963e-24	0.000292564	101.158
rs10916137	LINC01641	1	227581308	A	G	0.170947	-0.016006	0.00239093	2.19989e-11	0.000129634	44.8156
rs10932775	PNKD	2	219195799	A	G	0.49262	0.0100517	0.00180103	2.39999e-08	9.01037e-05	31.1483
rs11049230	RP11-993B23.1	12	28091653	A	G	0.033753	0.0286427	0.0050024	1e-08	9.48363e-05	32.7845
rs11060406	HIP1R	12	123339117	T	C	0.036816	-0.030691	0.00484693	2.39999e-10	0.00011598	40.0946
rs11107119	SOCS2	12	93983132	A	T	0.219837	0.025235	0.00217329	3.59998e-31	0.000389894	134.824
rs111281369	MROH1	8	145265892	T	C	0.136924	0.014647	0.00261455	2.1e-08	9.07839e-05	31.3835
rs111365325	FGF18	5	170865229	T	C	0.231133	-0.0192148	0.00213542	2.29985e-19	0.000234179	80.966
rs11191818	-	10	105591779	G	T	0.515762	0.0121479	0.00181158	1.99986e-11	0.00013007	44.9661
rs11259936	ADAMTSL3	15	84580582	C	A	0.521824	0.0190879	0.00180103	2.99985e-26	0.000324846	112.324
rs11623779	RIN3	14	93096391	C	T	0.184164	0.0221279	0.00232011	1.50003e-21	0.000263083	90.9622
rs11637681	BMF	15	40387971	G	A	0.276373	-0.0126907	0.00202859	4e-10	0.000113208	39.1363
rs11707746	ADCY5	3	123068817	C	T	0.287497	-0.0116185	0.00199756	5.99998e-09	9.78594e-05	33.8297
rs11721111	MECOM	3	169305417	T	C	0.120914	-0.018305	0.00276328	3.50026e-11	0.000126934	43.8821
rs11764404	AC006026.9	7	23587160	T	C	0.270963	-0.0196818	0.00202745	2.80027e-22	0.000272556	94.2382
rs11769042	BRAF	7	140460169	C	T	0.203838	0.0165489	0.00223877	1.39991e-13	0.00015805	54.6408
rs11877758	CELF4	18	35138110	G	T	0.312112	-0.0114095	0.00195246	5.1e-09	9.87804e-05	34.1481
rs11909473	AP000472.3	21	16547435	G	A	0.289527	0.0117567	0.00199521	3.79997e-09	0.000100437	34.7209
rs11967850	TIAM2	6	155451722	T	C	0.203063	-0.0145558	0.00223082	6.79986e-11	0.00012315	42.5736
rs12051245	-	16	783865	C	T	0.231348	0.0129281	0.00213626	1.40001e-09	0.00010594	36.6234
rs12052537	AC007969.5	2	172369108	A	C	0.206272	-0.0135473	0.00222952	1.2e-09	0.000106802	36.9216
rs12152266	DLG1	3	196911361	T	C	0.275366	0.0154644	0.00201238	1.50003e-14	0.000170811	59.0532
rs12256103	ZSWIM8	10	75545251	G	A	0.720334	-0.0113902	0.00199927	1.2e-08	9.38909e-05	32.4577
rs12273776	GTF2H1	11	18396318	T	C	0.104614	-0.0172631	0.0029671	5.99998e-09	9.79209e-05	33.8509
rs12290257	RP11-643G5.6	11	89314252	T	C	0.360225	-0.0125985	0.00188067	2.09991e-11	0.000129808	44.8756
rs12348592	CCL21	9	34711832	A	G	0.141962	0.0153543	0.00258447	2.80001e-09	0.000102098	35.2951
rs12385976	ACAN	15	89404092	C	T	0.043712	-0.0377317	0.00442455	1.50003e-17	0.000210343	72.723
rs12445607	ZFP1	16	75210233	G	C	0.59635	0.0113095	0.00186221	1.29999e-09	0.000106691	36.8831
rs12452590	MRC2	17	60720058	G	T	0.361774	0.0122418	0.0018938	1e-10	0.000120869	41.7849
rs12497779	RNU6-461P	3	98822050	T	G	0.232837	-0.0191815	0.00213033	2.19989e-19	0.000234484	81.0716
rs12509305	FAM13A	4	89935386	C	T	0.275673	-0.0145893	0.00202025	5.10035e-13	0.000150847	52.1502
rs12571363	HTRA1	10	124230612	A	C	0.107049	-0.0294653	0.00291227	4.60045e-24	0.000296056	102.366
rs12607758	DCC	18	51022606	T	C	0.592273	0.0134473	0.00183658	2.39994e-13	0.00015507	53.6103
rs12641030	REST	4	57803505	G	A	0.467603	-0.0120216	0.00180078	2.49977e-11	0.000128912	44.5657
rs12684650	QSOX2	9	139110654	T	C	0.31694	-0.0228761	0.00193329	2.60016e-32	0.000404892	140.013
rs12713685	PCBP1-AS1	2	70223101	C	T	0.374764	-0.0114173	0.00185541	7.59994e-10	0.000109533	37.8656
rs12908472	VPS13C	15	62186502	A	G	0.41576	-0.0100101	0.00182345	4e-08	8.71758e-05	30.1361
rs13042148	PXMP4	20	32298286	T	C	0.155527	-0.0220875	0.00248715	6.59933e-19	0.000228105	78.8654
rs13108218	HGFAC	4	3443931	G	A	0.615433	0.0152555	0.00186169	2.49977e-16	0.000194222	67.1484
rs13112742	RP11-404I7.1	4	124888059	A	G	0.170646	-0.0135477	0.00239135	1.5e-08	9.2843e-05	32.0954
rs13146142	LCORL	4	17931318	C	T	0.158559	-0.0397755	0.00245627	5.60015e-59	0.000758044	262.226
rs1362800	DAB2	5	39378115	T	C	0.412214	0.0105434	0.0018282	8.10009e-09	9.62092e-05	33.2592
rs1366594	MEF2C-AS1	5	88376061	C	A	0.470728	-0.0109262	0.00180051	1.29999e-09	0.000106524	36.8252
rs13723	CORO6	17	27941886	G	A	0.49196	-0.0112501	0.00180169	4.30002e-10	0.000112784	38.9897
rs140988776	SKI	1	2197233	T	C	0.071068	-0.0263304	0.00350036	5.40008e-14	0.000163668	56.5831
rs1415701	L3MBTL3	6	130345835	A	G	0.268205	-0.0233486	0.00205308	5.70033e-30	0.000374018	129.332
rs1417488	TGFB2	1	218523730	T	C	0.254568	0.0206391	0.00207085	2.09991e-23	0.000287279	99.3303
rs143723559	NPNT	4	106819824	C	T	0.022575	0.0345827	0.00623997	2.99999e-08	8.88503e-05	30.715
rs1438909	IPO8	12	30751112	C	T	0.586096	0.0121747	0.0018326	3.10027e-11	0.000127665	44.1345
rs1456031	FOXP2	7	114296102	C	T	0.549953	-0.0101554	0.00181428	2.19999e-08	9.06339e-05	31.3316
rs1458831	KDR	4	55958208	C	T	0.113252	0.0169336	0.00284828	2.80001e-09	0.000102243	35.3452
rs146715278	PDCD11	10	105163997	T	C	0.023514	0.0332366	0.00599113	2.90001e-08	8.9027e-05	30.7761
rs147110934	ZNF628	19	55993436	T	G	0.024219	-0.0529295	0.00585352	1.50003e-19	0.000236485	81.7634
rs1473527	TGFB2	1	218622319	A	G	0.286608	0.0181828	0.00198655	5.50047e-20	0.000242305	83.7761
rs1474647	WNT4	1	22441865	T	C	0.551114	-0.0144866	0.00180443	9.8992e-16	0.00018643	64.4541
rs1490384	RP11-394G3.2	6	126851160	T	C	0.499873	0.0268685	0.00179479	1.10002e-50	0.000647922	224.108
rs1516890	LINC01505	9	108989399	A	G	0.470163	-0.0117385	0.00181263	9.3994e-11	0.000121311	41.9377
rs1530555	ACMSD	2	135599739	T	C	0.373576	0.0127716	0.00185175	5.30029e-12	0.000137598	47.5689
rs1557271	CLIC6	21	36067775	C	T	0.370215	-0.0128615	0.00186668	5.60015e-12	0.000137318	47.4724
rs1561006	FBN2	5	127712056	C	T	0.112436	-0.0177975	0.00285772	4.70002e-10	0.000112195	38.7861
rs1662835	RP11-576N17.4	4	82172449	C	T	0.305316	0.0112047	0.00195348	9.69996e-09	9.51669e-05	32.8988
rs1668091	RP11-449D8.5	18	22290711	C	T	0.317741	0.0128333	0.00194405	4.10015e-11	0.000126053	43.5772
rs1679178	ESYT3	3	138156276	T	C	0.846199	0.0141549	0.00251288	1.79999e-08	9.17857e-05	31.7298
rs16905190	ZFAT	8	135598265	C	T	0.366854	-0.0158593	0.00187308	2.49977e-17	0.000207353	71.6891
rs17109082	LINC01362	1	83236757	G	A	0.3321	-0.0110293	0.00191	7.69999e-09	9.64566e-05	33.3447
rs17163588	PDIK1L	1	26450009	T	C	0.174995	0.0179003	0.00235912	3.29989e-14	0.00016653	57.5729
rs17177255	RP11-1003J3.1	17	68972281	T	C	0.213342	-0.0128098	0.00220029	5.80003e-09	9.80453e-05	33.894
rs17387279	C8orf34	8	69570332	G	T	0.181367	-0.0153641	0.00234509	5.70033e-11	0.000124161	42.9233
rs17400325	PDE11A	2	178565913	C	T	0.04143	0.0370848	0.00450157	1.69981e-16	0.000196301	67.8674
rs17448715	CSE1L	20	47691743	T	C	0.247221	0.0233431	0.00208594	4.49987e-29	0.00036216	125.231
rs1966265	FGFR4	5	176516631	A	G	0.2458	0.0161854	0.00208566	8.49963e-15	0.000174192	60.2223
rs1983753	GLIS3	9	4160364	A	G	0.85134	0.0144151	0.00254129	1.40001e-08	9.30746e-05	32.1754
rs2005172	GH1	17	61996255	C	A	0.639823	0.0233112	0.0018975	1.10002e-34	0.000436436	150.926
rs2007530	ARHGAP27P1-BPTFP1-KPNA2P3	17	62764047	T	C	0.173905	0.0217099	0.00238101	7.70016e-20	0.000240455	83.1363
rs2052478	AP3B1	5	77437291	T	C	0.23492	-0.0191466	0.00211578	1.39991e-19	0.000236856	81.8917
rs2073963	HDAC9	7	18877874	G	T	0.386173	-0.0110675	0.00184872	2.1e-09	0.000103671	35.8389
rs2093210	C14orf39	14	60957279	T	C	0.6078	-0.0147837	0.0018451	1.10002e-15	0.000185691	64.1984
rs2102418	RNU6-1213P	8	81295744	T	G	0.635556	0.0101957	0.00186756	4.79999e-08	8.62168e-05	29.8045
rs2131354	HHIP	4	145599908	A	G	0.526268	0.0243588	0.00180432	1.59993e-41	0.000526988	182.256
rs2131371	RP11-96H19.1	12	46796522	C	A	0.700756	0.0132398	0.00196349	1.59993e-11	0.00013152	45.4677
rs2165241	LOXL1	15	74222202	C	T	0.508373	0.0227735	0.00180196	1.29987e-36	0.000461863	159.723
rs2167734	AC105242.1	8	78110704	A	G	0.284733	0.0157674	0.00199627	2.80027e-15	0.000180446	62.3848
rs2194411	-	3	185548663	A	G	0.127974	0.0303043	0.00272321	9.20026e-29	0.000358126	123.835
rs2307207	-	19	4954644	T	C	0.409514	0.0120862	0.00184197	5.30029e-11	0.000124539	43.0538
rs2311313	RP11-35O15.1	15	99178274	G	T	0.173487	-0.0184596	0.00238641	1e-14	0.000173071	59.8345
rs2337984	PRELID2	5	140136811	A	G	0.466305	-0.00992895	0.00180893	4e-08	8.71505e-05	30.1273
rs2345725	RP11-111J6.2	2	18685915	G	T	0.22856	0.0140901	0.00213841	4.40048e-11	0.000125585	43.4154
rs2355595	RP11-32K4.1	8	64780939	T	C	0.35313	0.0102589	0.00188085	4.90004e-08	8.60598e-05	29.7503
rs2399796	CDC123	10	12256559	G	A	0.592804	0.0124332	0.00183319	1.20005e-11	0.000133057	45.999
rs246185	MIR193BHG	16	14395432	C	T	0.322472	0.0129067	0.00194262	3.10027e-11	0.000127686	44.142
rs2610986	MTCO3P44	4	18037231	T	C	0.65539	-0.016123	0.00194472	1.10002e-16	0.000198809	68.7345
rs2631676	PCGF5	10	93037409	G	A	0.189106	0.0184372	0.00229816	1e-15	0.000186163	64.3616
rs2663548	CTD-2378E12.1	15	51116593	C	T	0.45613	0.0115777	0.00180885	1.5e-10	0.000118504	40.9673
rs2678408	AC018717.1	2	199713224	C	T	0.462772	-0.0158394	0.00180639	1.80011e-18	0.000222383	76.8868
rs2717329	TWIST1	7	19062775	A	G	0.293929	0.016271	0.00200944	5.60015e-16	0.000189645	65.5656
rs2780226	TBC1D22B	6	34199092	T	C	0.910716	-0.0426631	0.00314542	6.59933e-42	0.000531938	183.969
rs278064	ARL15	5	53458923	C	T	0.376619	-0.0122853	0.00185766	3.80014e-11	0.000126511	43.7357
rs2807339	MIR4418	1	22578063	C	T	0.758793	0.0144391	0.00209776	5.90065e-12	0.000137042	47.3768
rs2812208	DLEU1	13	50707087	C	G	0.020822	0.0931636	0.0063141	2.90001e-49	0.00062942	217.704
rs28391281	INPP5B	1	38408974	C	T	0.457636	-0.0124031	0.00180079	5.70033e-12	0.000137221	47.4386
rs28457693	PTCH1	9	98217348	G	A	0.106964	0.0383138	0.00291828	2.19989e-39	0.000498408	172.367
rs2871960	ZBTB38	3	141121814	C	A	0.445203	0.0206263	0.00180755	3.69999e-30	0.000376568	130.215
rs2881019	AC004869.2	7	46583233	C	T	0.317598	-0.0144775	0.00193947	8.4004e-14	0.000161174	55.7209
rs28821528	HLA-DRB6	6	32528913	G	A	0.628312	-0.0149194	0.00226476	4.49987e-11	0.00012553	43.3966
rs2885697	SCMH1	1	41544279	T	G	0.664977	-0.0227089	0.00189969	6.20012e-33	0.00041323	142.897
rs28925904	GAB1	4	144359490	T	C	0.024991	-0.0385848	0.00575886	2.09991e-11	0.000129852	44.8908
rs28929474	SERPINA1	14	94844947	T	C	0.019746	0.051988	0.00647861	1e-15	0.000186254	64.3932
rs2974389	LINC00620	3	13787641	G	A	0.574868	-0.014622	0.00182021	9.49948e-16	0.000186653	64.5309
rs3116600	DLEU1	13	51107900	G	A	0.215369	-0.0139798	0.00219023	1.7e-10	0.000117846	40.7399
rs3253	THBS2	6	169616112	T	C	0.313752	0.0140123	0.00193832	4.90004e-13	0.000151163	52.2595
rs329923	BBX	3	107386894	A	G	0.38351	0.0103718	0.00185899	2.39999e-08	9.0045e-05	31.128
rs34104813	TET2	4	106127121	T	C	0.367862	-0.0192349	0.00186463	6.00067e-25	0.000307755	106.412
rs34278882	ASTN2	9	119257528	G	T	0.242753	0.0130737	0.00210217	5e-10	0.000111881	38.6775
rs34517439	DNAJB4	1	78450517	A	C	0.122092	0.0169465	0.00277439	1e-09	0.000107925	37.3098
rs34545616	SMO	7	128851867	T	C	0.010081	-0.049153	0.00899855	4.70002e-08	8.63102e-05	29.8368
rs34564665	ABLIM3	5	148604890	A	G	0.468625	-0.0102372	0.00180499	1.40001e-08	9.30501e-05	32.167
rs34810766	UTRN	6	144937315	T	C	0.18868	0.0128094	0.00230176	2.59998e-08	8.95866e-05	30.9696
rs35142265	RP11-749I16.3	17	38269759	G	A	0.218372	0.0155485	0.00218076	1e-12	0.000147042	50.8345
rs35344761	PCSK5	9	78510823	A	C	0.122165	-0.0192474	0.00276803	3.59998e-12	0.000139858	48.3504
rs35608354	RPL7L1P4	5	115039473	A	C	0.274906	0.0124898	0.0020246	6.90001e-10	0.000110085	38.0566
rs35810656	RALGPS2	1	178901190	G	A	0.340592	0.0117373	0.00190349	7.00003e-10	0.000109985	38.0218
rs35943760	RP11-333I13.1	2	47011755	T	A	0.468552	0.0128707	0.001806	1e-12	0.000146909	50.7886
rs36226649	NFATC4	14	24835500	C	T	0.06682	0.0287067	0.00360725	1.69981e-15	0.00018318	63.3303
rs3734254	PPARD	6	35395010	T	C	0.790982	0.022448	0.00220831	2.80027e-24	0.000298848	103.331
rs3757230	CD164	6	109704442	C	T	0.410117	-0.0151692	0.00182564	9.70063e-17	0.000199688	69.0387
rs3761123	ZGPAT	20	62342468	A	G	0.673552	-0.0143878	0.0019185	6.4003e-14	0.000162682	56.2422
rs3774219	LMCD1	3	8557688	T	C	0.540336	0.0103462	0.00180932	1.09999e-08	9.45877e-05	32.6985
rs3790085	WWP2	16	69887720	G	A	0.455681	-0.0222962	0.00180941	6.89922e-35	0.000439078	151.84
rs3791679	EFEMP1	2	56096892	G	A	0.226394	-0.0429926	0.00214278	1.50003e-89	0.00116325	402.559
rs3806443	RHOC	1	113249486	G	C	0.26513	0.0132402	0.00203946	8.49963e-11	0.000121913	42.146
rs3828559	WWC2	4	184211030	G	A	0.758742	0.0125642	0.00210033	2.19999e-09	0.000103513	35.7843
rs3858603	CRADD	12	94207802	A	G	0.502111	-0.012109	0.00179522	1.50003e-11	0.000131604	45.4966
rs3898135	FAM171B	2	187650446	A	G	0.315111	0.0124087	0.00194644	1.79999e-10	0.000117561	40.6413
rs3959716	ADPGK-AS1	15	73106615	G	C	0.567134	-0.0107541	0.00182376	3.69999e-09	0.00010058	34.7704
rs4244808	IGF2	11	2163110	G	T	0.459971	0.012953	0.00181774	1e-12	0.000146878	50.7779
rs4282339	SLIT3	5	168256240	A	G	0.207603	-0.0135237	0.00221125	9.59997e-10	0.000108196	37.4036
rs4319605	SLC7A1	13	30177397	A	G	0.226836	0.0117841	0.00215292	4.39997e-08	8.66651e-05	29.9595
rs4355095	NEU2	2	225466385	T	C	0.363826	0.0117126	0.00187573	4.30002e-10	0.000112788	38.9909
rs4471723	KANSL1	17	44205690	T	C	0.227028	-0.029754	0.00214906	1.39991e-43	0.000554239	191.686
rs4549685	POU6F2	7	39326478	T	C	0.330372	0.0109021	0.00191326	1.2e-08	9.39239e-05	32.4691
rs4674203	DIRC3	2	218582058	C	T	0.895779	0.0232216	0.00293789	2.70023e-15	0.000180709	62.4756
rs4700662	AC010376.1	5	64392906	T	C	0.664297	0.0147884	0.00191506	1.10002e-14	0.000172483	59.6314
rs480640	MPPED2	11	30470523	G	A	0.485168	0.0109038	0.00180192	1.40001e-09	0.000105921	36.617
rs480958	AP002954.4	11	118577990	A	G	0.635481	0.010351	0.00187354	3.29997e-08	8.82968e-05	30.5236
rs4852252	ZNF638	2	71539301	C	T	0.564487	-0.0124138	0.00181092	7.10068e-12	0.000135924	46.9903
rs4876399	EXT1	8	119045329	C	T	0.44174	-0.00999941	0.00182118	4e-08	8.72067e-05	30.1467
rs4888165	CMIP	16	81728192	A	G	0.242244	-0.0121478	0.0021106	8.60003e-09	9.58267e-05	33.1269
rs4959021	C4B	6	31981146	C	T	0.814319	-0.0314774	0.00242642	1.69981e-38	0.00048663	168.292
rs4969409	AATK	17	79125723	C	T	0.351218	-0.0109232	0.00188336	6.59994e-09	9.73051e-05	33.638
rs5010229	RNU7-145P	18	38036676	T	C	0.367858	0.0115708	0.00186726	5.80003e-10	0.000111074	38.3985
rs513953	MTCL1	18	8801351	G	A	0.74484	0.0120293	0.00207098	6.29999e-09	9.75958e-05	33.7385
rs555554	U8	3	172155585	T	G	0.322799	0.0165188	0.00192533	9.49948e-18	0.000212911	73.6112
rs55681913	GHR	5	42687629	C	T	0.106577	0.0196909	0.00294469	2.29985e-11	0.000129342	44.7146
rs55758152	FBXW11	5	171317318	A	G	0.326221	0.0119248	0.00194082	8e-10	0.000109202	37.7511
rs55775505	-	6	22057566	T	C	0.314716	-0.0174778	0.00193553	1.69981e-19	0.000235839	81.5401
rs55786114	ARIH2	3	48982335	T	C	0.073468	-0.0221824	0.00344319	1.2e-10	0.000120057	41.5043
rs56353224	C5orf66	5	134414688	C	T	0.371722	-0.0118712	0.0018998	4.09996e-10	0.000112946	39.0455
rs5742643	IGF1	12	102837863	C	T	0.752975	-0.0156901	0.00207041	3.50026e-14	0.000166116	57.4297
rs575837	DSE	6	116759974	G	A	0.784213	0.0134454	0.00219742	9.40005e-10	0.000108298	37.4385
rs5763821	-	22	30549071	C	A	0.39077	0.0137318	0.00189231	4.00037e-13	0.000152317	52.6584
rs6000889	snoU13	22	38184851	T	C	0.644856	0.0104861	0.00188237	2.5e-08	8.97684e-05	31.0324
rs602051	ATP5G1	17	46966950	C	T	0.540356	-0.0101264	0.00180577	2e-08	9.09684e-05	31.4473
rs6066105	EYA2	20	45532434	A	G	0.323904	0.0162746	0.00192991	3.40017e-17	0.000205685	71.1122
rs60745172	RSRC1	3	158200367	C	A	0.337427	-0.0183741	0.00189678	3.40017e-22	0.000271397	93.8373
rs60839038	CABLES1	18	20711927	C	A	0.473723	0.012317	0.00183209	1.80011e-11	0.000130739	45.1974
rs61037750	RP11-472I20.4	11	43681372	A	G	0.31012	-0.0109924	0.00194741	1.7e-08	9.21669e-05	31.8616
rs6140000	CASC20	20	6435839	G	T	0.498231	-0.0106407	0.00180197	3.50002e-09	0.000100866	34.8693
rs61732778	BCL6	3	187443314	A	G	0.071088	0.0205703	0.00349353	3.89996e-09	0.000100289	34.6697
rs62018872	TMEM114	16	8635093	A	G	0.120625	-0.0180057	0.00277959	9.30037e-11	0.000121381	41.962
rs62088172	SERPINF1	17	1666253	T	C	0.352274	0.0116801	0.00189525	7.10003e-10	0.000109864	37.9802
rs62194733	RN7SL423P	2	161776671	T	C	0.11801	-0.015819	0.00279484	1.5e-08	9.2672e-05	32.0362
rs62276616	SPTSSB	3	156382492	A	G	0.042766	-0.0314866	0.00447792	1.99986e-12	0.000143015	49.442
rs62515437	RP11-140I16.2	8	57160328	T	G	0.225286	0.0171919	0.00215484	1.50003e-15	0.000184112	63.6525
rs62576695	2021-12-01	9	118309051	T	C	0.194795	0.0134361	0.00227114	3.29997e-09	0.000101242	34.999
rs62621197	ADAMTS10	19	8670147	T	C	0.037006	-0.075096	0.00495279	6.29941e-52	0.000664645	229.896
rs6570503	AL356739.1	6	142611580	T	C	0.456733	-0.0105969	0.00180744	4.49997e-09	9.94332e-05	34.3738
rs6571778	SLC25A21	14	37538594	A	G	0.353616	-0.0131331	0.00188565	3.29989e-12	0.000140312	48.5076
rs6579167	ITCH	20	33032915	C	T	0.216289	0.0129486	0.00220812	4.49997e-09	9.94722e-05	34.3873
rs659418	SERPINH1	11	75284334	G	T	0.140248	0.014387	0.00259482	2.90001e-08	8.89267e-05	30.7414
rs663378	BAMBI	10	28975214	A	G	0.833455	-0.0157269	0.00243718	1.09999e-10	0.000120449	41.6398
rs66746153	CPE	4	166322542	G	T	0.287163	0.0151053	0.00198883	3.10027e-14	0.000166854	57.6847
rs6686129	RP11-306I1.2	1	165591948	C	T	0.670681	-0.0112769	0.00191844	4.09996e-09	9.99503e-05	34.5526
rs6709833	STK25	2	241775575	T	C	0.709559	-0.014879	0.00198036	5.79963e-14	0.00016328	56.4491
rs67232546	ETS1	11	128398938	T	C	0.212416	-0.0136619	0.00221573	7.00003e-10	0.000109973	38.0177
rs6762578	COPG1	3	128992047	A	G	0.778514	0.0180682	0.00217337	9.30037e-17	0.000199903	69.113
rs6810039	SUSD5	3	33194990	A	C	0.400276	-0.0130952	0.00183418	9.3994e-13	0.000147442	50.9727
rs6878780	LMNB1	5	122093740	C	T	0.42605	-0.0108547	0.00181965	2.39999e-09	0.000102934	35.5842
rs6886191	TBCA	5	77157607	G	A	0.559214	0.0118921	0.00181712	6.00067e-11	0.000123891	42.8299
rs6887350	CEP120	5	122711841	T	C	0.438193	-0.0157889	0.00181079	2.80027e-18	0.000219896	76.0265
rs6902771	ESR1	6	152157881	T	C	0.462302	0.0146844	0.00179907	3.29989e-16	0.000192698	66.6214
rs6907284	EPB41L2	6	131183519	C	T	0.697241	-0.013812	0.00197005	2.39994e-12	0.000142181	49.1537
rs6919321	TBC1D22B	6	33724004	A	G	0.607644	0.0119864	0.00184643	8.49963e-11	0.0001219	42.1414
rs6923431	LAMA2	6	129824754	C	A	0.7346	0.015526	0.00201391	1.29987e-14	0.000171913	59.4342
rs6977081	AOC1	7	150542515	T	G	0.333515	0.015136	0.0019228	3.50026e-15	0.000179234	61.9657
rs7033487	PAPPA	9	119129257	C	T	0.198618	-0.0153446	0.002255	1e-11	0.000133938	46.3037
rs71427097	SEMA4C	2	97526963	T	C	0.02948	-0.0341879	0.00540871	2.59998e-10	0.000115572	39.9535
rs71490394	EML3	11	62370155	A	G	0.371116	0.0124817	0.00186455	2.19989e-11	0.000129625	44.8123
rs7172622	RP11-382A20.4	15	83970546	G	A	0.565898	0.0102747	0.00185413	2.99999e-08	8.88309e-05	30.7083
rs723588	BCKDHB	6	81056634	C	T	0.142713	0.022554	0.00256304	1.39991e-18	0.000223967	77.4344
rs72656010	PLAG1	8	57122215	C	T	0.131898	-0.0331115	0.00266723	2.19989e-35	0.000445644	154.111
rs72721175	DNM3	1	172227532	G	A	0.170706	0.0232171	0.00240415	4.60045e-22	0.000269724	93.2589
rs72755233	ADAMTS17	15	100692953	A	G	0.112197	-0.0355959	0.00284616	6.89922e-36	0.000452303	156.415
rs72907878	LINC01876	2	157083697	A	G	0.134864	-0.0165114	0.00263305	3.59998e-10	0.000113748	39.323
rs72976986	ZBTB7A	19	4050424	A	G	0.1904	0.0166405	0.0023135	6.29941e-13	0.000149649	51.7358
rs7302902	DRAM1	12	102346239	T	C	0.301722	0.0110079	0.00196055	2e-08	9.11923e-05	31.5247
rs73046792	SNRNP70	19	49605705	A	G	0.163389	0.0135626	0.0024362	2.59998e-08	8.96532e-05	30.9926
rs73048979	TSPAN9	12	3391162	T	C	0.027083	0.0401158	0.00553634	4.30031e-13	0.000151867	52.5029
rs735830	DNASE1	16	3695354	A	G	0.208733	-0.0197704	0.00221387	4.30031e-19	0.000230659	79.7488
rs739454	PLCD3	17	43195205	T	C	0.055653	0.025662	0.00392413	6.20012e-11	0.000123704	42.7653
rs7443323	EBF1	5	158368797	A	T	0.252385	-0.0189967	0.00207626	5.70033e-20	0.000242121	83.7125
rs74796687	NEU2	2	227353803	C	T	0.024226	-0.0405699	0.00583946	3.69999e-12	0.00013962	48.2681
rs7503332	CTD-2535L24.2	17	63563513	G	T	0.482108	0.0114649	0.00182013	2.99999e-10	0.000114771	39.6765
rs75166711	RP11-702F3.3	11	46154590	A	G	0.144734	0.0170414	0.00256995	3.29989e-11	0.000127189	43.9702
rs7582299	NOP58	2	203150993	C	T	0.243906	-0.0145517	0.00208777	3.19963e-12	0.000140522	48.5802
rs76785101	NRG1	8	32305121	T	C	0.059454	-0.0213152	0.00382602	2.5e-08	8.97821e-05	31.0372
rs76895963	CCND2	12	4384844	G	T	0.020669	0.0754844	0.00695832	1.99986e-27	0.000340332	117.68
rs76993203	BOK	2	242498497	A	G	0.454692	-0.0199857	0.00180549	1.80011e-28	0.000354356	122.531
rs773652	CS	12	56674766	A	G	0.932316	-0.0260066	0.00357331	3.40017e-13	0.000153216	52.9692
rs7753558	TRMT11	6	117523471	A	C	0.634567	0.0104094	0.00187512	2.80001e-08	8.91454e-05	30.817
rs7781021	TBXAS1	7	139715866	C	T	0.209036	0.0124454	0.0022497	3.2e-08	8.85268e-05	30.6031
rs78378222	TP53	17	7571752	G	T	0.012306	0.0611853	0.00833674	2.09991e-13	0.000155804	53.8641
rs78579285	PIEZO1	16	88813060	T	C	0.181529	-0.0145039	0.00233271	5e-10	0.000111826	38.6586
rs7873096	GADD45G	9	92230041	A	G	0.209167	-0.0137731	0.00224355	8.30004e-10	0.000109016	37.6868
rs78956703	SPRED1	15	38553368	A	G	0.063282	-0.0227253	0.00368986	7.29995e-10	0.000109723	37.9312
rs79073127	FOXN2	2	48573895	C	G	0.122627	-0.0159439	0.00273501	5.60003e-09	9.83045e-05	33.9836
rs7920127	PPIF	10	81122914	C	T	0.499888	-0.0103451	0.0017979	8.70001e-09	9.57726e-05	33.1082
rs79262430	PPP6R3	11	68366644	T	A	0.038301	-0.0294369	0.00470921	4.09996e-10	0.000113027	39.0738
rs79409628	FER	5	108113740	T	G	0.08378	0.0303121	0.00323908	8.10028e-21	0.000253293	87.5762
rs7952436	KDM2A	11	67024534	T	C	0.082207	-0.0456289	0.00327562	4.19952e-44	0.00056104	194.04
rs7968682	HMGA2	12	66371880	T	G	0.51781	-0.0252012	0.00180449	2.49977e-44	0.00056394	195.043
rs7977418	CCDC91	12	28588242	C	T	0.458858	-0.0162569	0.00180479	2.09991e-19	0.000234674	81.1371
rs79802978	BRWD1P3	7	17040103	A	G	0.04173	-0.0257512	0.00450938	1.09999e-08	9.43333e-05	32.6106
rs798490	GNA12	7	2801542	A	G	0.293178	-0.0178807	0.00197729	1.50003e-19	0.000236521	81.776
rs8001781	MIR17HG	13	92019155	G	A	0.661834	-0.013149	0.00190542	5.19996e-12	0.000137749	47.6213
rs80236851	AC116606.1	5	52800060	G	A	0.022703	-0.0350431	0.00633814	3.2e-08	8.84275e-05	30.5688
rs8041080	ADAMTS17	15	100843884	T	C	0.452272	-0.0121459	0.00180939	1.9002e-11	0.000130342	45.0601
rs8107719	ILF3	19	10804389	C	T	0.664898	-0.0144548	0.00190848	3.59998e-14	0.000165929	57.3649
rs830643	RP11-154H23.4	3	71667063	A	G	0.413556	0.0143363	0.0018299	4.70002e-15	0.000177536	61.3786
rs859306	C16orf71	16	4789652	T	C	0.584853	-0.0116386	0.00182646	1.89998e-10	0.000117456	40.6049
rs879098	TMEM14C	6	2507448	G	A	0.399099	-0.0100515	0.00183837	4.60002e-08	8.64775e-05	29.8946
rs9295	CRIM1	2	36777825	A	G	0.295456	0.0153235	0.00197278	8.00018e-15	0.000174513	60.3332
rs9379084	RREB1	6	7231843	A	G	0.115471	-0.0276649	0.00289402	1.20005e-21	0.000264293	91.3803
rs9431040	HLX	1	221152299	C	T	0.719501	-0.0131891	0.00200312	4.60045e-11	0.000125403	43.3525
rs9435733	MFAP2	1	17308254	C	T	0.521094	0.0267927	0.00179662	2.70023e-50	0.000642963	222.391
rs9442580	Z98044.1	1	9339467	T	C	0.128371	0.0165471	0.00268286	6.90001e-10	0.000110038	38.0404
rs9542595	LINC00348	13	71722247	A	G	0.308238	-0.0132463	0.00195892	1.39991e-11	0.000132264	45.725
rs9590507	UPF3A	13	115058408	C	T	0.226784	-0.0124991	0.00216026	7.19996e-09	9.68385e-05	33.4767
rs9745989	ZNF423	16	49888931	C	T	0.628003	0.0105374	0.00190756	3.29997e-08	8.82707e-05	30.5146
rs9809116	LINC02050	3	72397279	G	A	0.408088	-0.0144676	0.00184314	4.19952e-15	0.000178215	61.6132
rs9912553	ASPSCR1	17	79959703	G	C	0.723466	0.0199774	0.00201211	3.10027e-23	0.000285099	98.5762
rs9988728	PRKG1	10	53289428	A	G	0.271086	0.0113712	0.00203269	2.19999e-08	9.05265e-05	31.2945
rs1011400#	ABLIM3	5	148611941	C	G	0.466383	-0.0116505	0.00190984	1.09999e-09
rs10490551#	EML4	2	42560388	A	T	0.276653	0.0155708	0.00212515	2.39994e-13
rs11621587#	RIN3	14	93098339	C	G	0.183954	0.0217856	0.00245436	6.90081e-19
rs12413039#	SEC24C	10	75524759	G	C	0.267943	0.0143763	0.00214548	2.09991e-11
rs12792817#	PRDM11	11	45202450	G	C	0.449277	-0.0105291	0.00192138	4.30002e-08
rs13101469#	LINC01091	4	124821733	T	A	0.197043	-0.0176406	0.00240014	1.99986e-13
rs17058252#	SCARA5	8	27774938	G	C	0.09033	-0.0186626	0.00332003	1.89998e-08
rs17099139#	BAG3	10	121419487	G	C	0.274619	-0.0126637	0.00214391	3.50002e-09
rs1786812#	CELF4	18	35086406	C	G	0.698193	0.0127955	0.00209401	9.90011e-10
rs1892525#	GNG12-AS1	1	68355614	C	G	0.29561	-0.0124853	0.002082	2e-09
rs2236610#	CLIC6	21	36060668	G	C	0.200112	-0.0145867	0.0023856	9.69996e-10
rs2284746#	MFAP2	1	17306675	G	C	0.522181	0.0133542	0.00190253	2.19989e-12
rs262827#	TULP4	6	158683646	T	A	0.336584	0.0153378	0.00201374	2.60016e-14
rs28446901#	ADAMTS13	9	136308796	G	C	0.154202	-0.0155462	0.00264967	4.39997e-09
rs34563869#	RP11-140I16.2	8	57151776	A	T	0.143456	-0.0261627	0.00275153	1.9002e-21
rs35506#	RP11-25E2.1	12	115500691	A	T	0.715326	0.0123073	0.00211572	5.99998e-09
rs3790141#	KIZ	20	21187315	G	C	0.433025	0.0105422	0.00192243	4.20001e-08
rs4800123#	RP11-863N1.4	18	20010241	G	C	0.41794	0.0108376	0.00194697	2.59998e-08
rs4909034#	TRIM71	3	32931120	G	C	0.332194	-0.0134478	0.00202103	2.90001e-11
rs5992930#	MICAL3	22	18452843	C	G	0.274638	0.0152859	0.00214005	9.09913e-13
rs60084210#	RP11-154H23.4	3	71681755	C	G	0.435576	0.0147433	0.001929	2.09991e-14
rs7162542#	ADAMTSL3	15	84514290	G	C	0.556314	0.0253456	0.00191623	6.09958e-40
rs7506068#	DYM	18	46884649	G	C	0.669591	0.0121685	0.00202654	1.89998e-09
rs7854962#	RP11-2B6.3	9	96900505	G	C	0.213042	-0.0183882	0.00234501	4.49987e-15
rs9701805#	FAF1	1	51356810	C	G	0.089393	0.0229873	0.00332993	5.10035e-12
rs9824092#	BSN	3	49674147	G	C	0.300373	0.0127832	0.00207315	7.00003e-10
rs7124681*	CELF1	11	47529947	A	C	0.408394	-0.0148834	0.00182569	3.59998e-16
Total										0.0475736	65.3512
IV, instrumental variable; FVC, forced vital capacity; Chr, chromosome; EA, effect allele;NEA, non-effect allele; EAF, effect allele frequency; SE, standard error; SNP, single nucleotide polymorphism.
aR2 were calculated using the following formula: (2×EAF×(1-EAF)×beta2)/[(2×EAF×(1-EAF)×beta2) + (2×EAF×(1-EAF)×N×SE2)], where EAF is the effect allele frequency, beta is the estimated effect on FVC, Ν is the sample size of the GWAS for the SNP-FVC association and SE is the standard error of the estimated effect.
bF-statistic were calculated using the following formula: R2(N-2)/(1-R2), where R2 is the proportion of variance in FVC explained by each instrument and N is the sample size of the GWAS for the FVC association.
#Removing the following SNPs for being palindromic with intermediate allele frequencies.
*Removing the SNPs that showed pleiotropic associations at genome-wide significance (p<5 × 10-8).
Supplementary Table 8 Characteristics of the SNPs used as IVs for FEV1/FVC in the MR analysis.
SNP	Nearest gene	Chr	Position	EA	NEA	EAF	Beta	SE	P-value	R2a	F-statisticb
rs10041997	LMNB1	5	120198311	A	G	0.451138	0.00551751	0.000879027	3.50002e-10	0.000111499	39.3985
rs10059996	HMP19	5	170901463	G	T	0.644492	-0.00800668	0.000931057	8.00018e-18	0.000209266	73.952
rs10102857	MTUS1	8	17649299	T	C	0.828618	-0.00650304	0.00115483	1.79999e-08	8.9742e-05	31.7099
rs10175428	LINC01798	2	66915694	A	G	0.228895	0.0057785	0.00104382	3.09999e-08	8.6732e-05	30.6462
rs1028655	RP11-92C4.4	9	101652106	G	A	0.620225	-0.00510024	0.000896879	1.29999e-08	9.15191e-05	32.3378
rs10750866	AP000662.4	11	57404779	G	A	0.269744	0.00578354	0.000984778	4.30002e-09	9.76127e-05	34.4912
rs10974339	GLIS3	9	4122132	A	G	0.439322	0.00624208	0.000884514	1.69981e-12	0.000140937	49.802
rs11088268	PCP4	21	35363759	G	T	0.128993	-0.00860283	0.00130337	4.10015e-11	0.000123291	43.5657
rs11134789	ADAM19	5	156944199	A	C	0.34193	0.00883975	0.000917532	5.70033e-22	0.00026264	92.8186
rs11149815	-	16	75336173	G	T	0.588466	0.00890766	0.000893608	2.09991e-23	0.000281157	99.3644
rs115503647	RP11-431M7.3	4	36271840	G	A	0.052556	0.0113082	0.00194715	6.29999e-09	9.54519e-05	33.7276
rs11607392	CTD-2005H7.2	11	86437417	C	T	0.127512	0.00898822	0.00130856	6.4998e-12	0.000133518	47.18
rs11648508	MMP15	16	58063513	T	G	0.684233	-0.00706946	0.000940749	5.70033e-14	0.000159806	56.4706
rs11657101	TLK2	17	60636826	A	G	0.361336	0.00555382	0.000911513	1.09999e-09	0.000105063	37.1241
rs11658500	CISD3	17	36886828	A	G	0.139425	0.00775581	0.00125537	6.49995e-10	0.000108019	38.1688
rs116959973	BHMG1	19	46252333	T	A	0.268643	-0.00643929	0.000989969	7.8001e-11	0.000119734	42.3088
rs117436522	RNU6-305P	17	69425597	T	C	0.017237	0.01941	0.00334308	6.4e-09	9.54012e-05	33.7097
rs11759102	ID4	6	19837774	T	C	0.160302	-0.00747343	0.00119172	3.59998e-10	0.000111296	39.3268
rs11856837	THSD4	15	71621562	C	T	0.172965	0.0068827	0.00115138	2.30001e-09	0.000101129	35.7337
rs1192419	RP11-91I11.1	1	92080059	G	A	0.811852	-0.00804345	0.00111371	5.10035e-13	0.000147609	52.1601
rs12202314	RUNX2	6	45530471	C	T	0.324156	-0.00530935	0.000936867	1.5e-08	9.08919e-05	32.1162
rs12470864	IL1RL1	2	102926362	A	G	0.387739	0.00543495	0.000893667	1.2e-09	0.000104672	36.986
rs12522114	ITGA1	5	52187038	A	C	0.265328	0.00807822	0.000990595	3.50026e-16	0.000188189	66.5023
rs12698403	RP11-362B23.1	7	156127246	A	G	0.440807	0.00571852	0.000879853	8.10028e-11	0.000119545	42.242
rs12820313	SNRPF	12	96255704	C	T	0.792726	0.0095698	0.00107388	5.00035e-19	0.000224716	79.413
rs1286647	RARB	3	25537669	A	G	0.182816	-0.00787017	0.00112715	2.90001e-12	0.000137969	48.7531
rs12914385	CHRNA3	15	78898723	T	C	0.381196	0.00772655	0.000897432	7.29962e-18	0.000209756	74.1252
rs13018626	AC009474.2	2	67087652	T	C	0.066747	0.0113685	0.00174561	7.39946e-11	0.000120032	42.414
rs13141641	FHDC1	4	145506456	C	T	0.392895	-0.0166794	0.000890628	2.90001e-78	0.000991688	350.724
rs13332450	FAM65A	16	67549170	C	T	0.075419	-0.0115618	0.00165295	2.70023e-12	0.000138455	48.9248
rs1367228	EFEMP1	2	56112440	A	C	0.42733	-0.00561635	0.000881396	1.89998e-10	0.000114909	40.6035
rs140110	ZMAT5	22	30131148	A	G	0.506224	-0.00560632	0.000873716	1.40001e-10	0.000116521	41.173
rs1420472	SLC2A2	3	168776326	T	G	0.437709	0.00681041	0.00088067	1e-14	0.000169233	59.8023
rs143470463	RAPGEFL1	17	38352743	A	ATT	0.845526	-0.0088632	0.00120454	1.9002e-13	0.000153218	54.1422
rs143498544	DTWD1	15	49996387	T	C	0.056301	-0.0111069	0.00189031	4.20001e-09	9.77046e-05	34.5237
rs1570227	SLC1A2	11	35397619	C	T	0.747221	0.00605958	0.00100169	1.5e-09	0.000103565	36.5945
rs1636247	GNA12	7	2881917	G	A	0.29392	-0.00622946	0.000958234	8.00018e-11	0.000119603	42.2625
rs16909904	PTCH1	9	98236865	T	C	0.091073	0.0122622	0.0015129	5.30029e-16	0.000185897	65.6922
rs17666332	RBMS3	3	29469675	G	T	0.279773	0.00626947	0.000975415	1.29999e-10	0.000116915	41.3124
rs17759204	FEZF2	3	55158224	G	A	0.280573	0.00615034	0.000974872	2.80001e-10	0.00011264	39.8016
rs1874903	RP11-1028N23.3	12	115950227	T	C	0.479935	-0.00506462	0.000881253	9.09997e-09	9.34738e-05	33.0286
rs1896797	SH3GL3	15	84274591	A	G	0.490231	-0.00693	0.000872663	1.99986e-15	0.000178457	63.0625
rs200994949	HOXC4	12	54421424	AT	A	0.633606	-0.00528714	0.000904769	5.1e-09	9.66412e-05	34.1479
rs2022210	CRIM1	2	36717505	G	A	0.252616	-0.00681607	0.00100397	1.10002e-11	0.000130439	46.0919
rs2070600	AGER	6	32151443	T	C	0.063068	-0.0245933	0.001787	4.30031e-43	0.000535784	189.401
rs2076295	DSP	6	7563232	G	T	0.450887	-0.00593526	0.000876873	1.29987e-11	0.000129655	45.8146
rs2096468	AP000318.2	21	35661745	C	A	0.55987	-0.00609201	0.000877862	3.90032e-12	0.000136285	48.1578
rs2165489	THSD4	15	71673778	T	C	0.224798	0.0157778	0.00104417	1.39991e-51	0.000645815	228.322
rs2297379	RPAP1	15	41819283	A	G	0.409137	-0.0050252	0.000887313	1.5e-08	9.07719e-05	32.0738
rs2516491	PPIAP9	6	31485101	C	A	0.276974	0.00731027	0.000971721	5.40008e-14	0.000160159	56.5954
rs2544531	LINC01804	2	15904041	G	A	0.516161	-0.00551676	0.000870296	2.30001e-10	0.000113716	40.182
rs2609264	FAM13A	4	89828080	T	C	0.788609	0.011681	0.00106754	7.29962e-28	0.000338753	119.726
rs2774943	FAM69A	1	93318460	G	T	0.894559	0.00989182	0.00141786	2.99985e-12	0.000137741	48.6725
rs2799098	TGFB2	1	218521609	A	G	0.821988	0.00750227	0.00113563	3.90032e-11	0.000123508	43.6425
rs2806356	ARMC2	6	109266255	C	T	0.186067	0.0104882	0.00111828	6.70039e-21	0.000248903	87.9627
rs28418633	HLA-DQA1	6	32619285	T	C	0.074471	-0.0107563	0.00188227	1.09999e-08	9.24187e-05	32.6557
rs28576874	EFCAB5	17	28438270	T	C	0.448861	0.00717473	0.000874899	2.39994e-16	0.000190305	67.2501
rs2909	TSHZ3	19	31827698	G	A	0.126209	0.00969673	0.0013188	1.9002e-13	0.00015299	54.0618
rs2991970	AKR1A1	1	46011005	T	C	0.423552	-0.00499216	0.00088605	1.79999e-08	8.98379e-05	31.7437
rs2999090	EEFSEC	3	127931340	A	G	0.881134	0.00882083	0.00134427	5.30029e-11	0.000121852	43.057
rs330939	RP11-10A14.4	8	9018590	G	T	0.376404	0.00661152	0.000907859	3.29989e-13	0.000150085	53.0351
rs34086083	CPD	17	28734974	T	C	0.440774	0.00518899	0.000875998	3.2e-09	9.93011e-05	35.0879
rs34325208	RPL19P11	5	30913434	T	TA	0.658355	0.00617112	0.000942476	5.79963e-11	0.000121331	42.8731
rs35305377	STAG3L5P-PVRIG2P-PILRB	7	99938955	A	G	0.547841	-0.00621194	0.000877114	1.39991e-12	0.000141945	50.158
rs35585926	SLC30A10	1	219926400	C	CT	0.222313	0.00692009	0.00107223	1.09999e-10	0.000117878	41.6529
rs36084521	ITPK1	14	93516398	G	T	0.110749	0.00809839	0.00138771	5.39995e-09	9.6382e-05	34.0563
rs3903013	RP11-478K15.6	13	44833838	T	C	0.218187	0.0067136	0.00105575	2e-10	0.00011444	40.4377
rs4308141	STK25	2	239881309	G	C	0.197718	-0.0100251	0.00109335	4.79954e-20	0.0002379	84.073
rs4318980	C1GALT1	7	7256490	A	G	0.411902	0.00500705	0.000888827	1.79999e-08	8.98107e-05	31.7342
rs4444235	MIR5580	14	54410919	C	T	0.464296	0.00502395	0.000872709	8.60003e-09	9.37884e-05	33.1398
rs4672084	RP11-481J13.1	2	56229384	T	C	0.092769	-0.00890693	0.00149822	2.80001e-09	0.000100023	35.3429
rs4837585	ASTN2	9	119282870	C	T	0.537991	-0.00567405	0.000876506	9.60064e-11	0.000118594	41.9058
rs4904145	RP11-353P15.1	14	84338200	G	A	0.303252	0.00589415	0.000950933	5.69994e-10	0.000108726	38.4185
rs4934170	FAM213A	10	82203683	A	G	0.495603	-0.00499707	0.000869565	9.09997e-09	9.34596e-05	33.0236
rs56353819	BACH2	6	91012867	T	C	0.349906	-0.00560313	0.000920887	1.2e-09	0.000104771	37.0208
rs57062879	CDC123	10	12278525	G	A	0.514163	-0.00863641	0.000871485	3.80014e-23	0.000277884	98.2074
rs59041913	C5orf56	5	131788135	T	C	0.231174	0.00744373	0.00103342	5.90065e-13	0.000146826	51.883
rs59768436	CERS6	2	169494573	G	GA	0.763564	0.00624801	0.00103974	1.89998e-09	0.000102194	36.1103
rs62126405	KCNS3	2	18303119	G	A	0.142995	-0.00793612	0.00124792	2e-10	0.000114454	40.4427
rs631126	MTCL1	18	8800723	C	T	0.749197	-0.00563786	0.00100709	2.19999e-08	8.86934e-05	31.3393
rs6597255	RREB1	6	7207990	G	A	0.542591	0.00539567	0.000874583	6.90001e-10	0.000107716	38.0615
rs6781704	ADCY5	3	123085098	A	G	0.532052	-0.00513044	0.000873288	4.20001e-09	9.76764e-05	34.5137
rs6823809	NPNT	4	106828795	C	T	0.295642	0.0131934	0.000954209	1.80011e-43	0.000540791	191.172
rs71498912	CHRM3	1	239914160	C	A	0.42306	0.00620443	0.000885385	2.39994e-12	0.000138969	49.1063
rs72659200	BTC	4	75674978	T	C	0.262279	-0.00585193	0.000989235	3.29997e-09	9.90363e-05	34.9943
rs72698179	UBE2Q1	1	154522394	A	C	0.029046	0.0157681	0.00268085	4.09996e-09	9.7906e-05	34.5948
rs72855749	LINC01818	2	151056757	G	A	0.04493	-0.0125417	0.00210171	2.39999e-09	0.000100777	35.6094
rs73187250	TRABD	22	50634552	A	G	0.133028	-0.00761437	0.0012865	3.2e-09	9.91387e-05	35.0305
rs73554677	ARHGAP20	11	110617051	A	G	0.063411	0.0115726	0.00178697	9.3994e-11	0.00011869	41.9397
rs74053118	AL162759.1	14	54339264	C	T	0.096175	-0.0101429	0.00147805	6.79986e-12	0.000133268	47.0916
rs7583863	TEX41	2	145764034	A	G	0.256446	0.00546951	0.000996536	4.09996e-08	8.52534e-05	30.1237
rs7596327	AC012363.4	2	120952127	G	T	0.749481	0.00594537	0.00100605	3.40001e-09	9.88357e-05	34.9234
rs76259984	NEU2	2	229577693	T	C	0.081003	-0.0156028	0.00160144	1.99986e-22	0.000268599	94.9251
rs76877325	RP11-392O17.2	1	219483874	A	G	0.076858	0.00955917	0.00163687	5.19996e-09	9.65179e-05	34.1043
rs7733410	HTR4	5	147856522	A	G	0.441947	-0.0123693	0.000876123	2.90001e-45	0.000563836	199.323
rs7753012	ADGRG6	6	142745883	G	T	0.304985	-0.0159976	0.000947422	5.79963e-64	0.000806325	285.115
rs77714938	LINC01748	1	60926112	C	T	0.049612	0.0129668	0.00200974	1.09999e-10	0.000117807	41.6278
rs78442819	TEKT5	16	10740982	C	G	0.197408	0.00781524	0.00112046	3.10027e-12	0.00013768	48.6507
rs79898473	RASGEF1C	5	179598771	C	T	0.33121	-0.00712453	0.000929325	1.80011e-14	0.000166319	58.7726
rs8039637	TTC23	15	99686951	T	C	0.136435	0.00843341	0.00127089	3.19963e-11	0.000124616	44.034
rs9273105	HLA-DQA1	6	32612601	A	G	0.458156	0.00950363	0.000914903	2.80027e-25	0.000305305	107.901
rs9435731	MFAP2	1	17306029	A	C	0.519896	0.00931995	0.000871595	1.10002e-26	0.000323516	114.339
rs955277	RP11-734K21.4	2	9290357	T	C	0.616232	0.00625084	0.000902194	4.30031e-12	0.000135849	48.0037
rs9605475	MICAL3	22	18463306	C	T	0.257333	-0.00664755	0.00100048	2.99985e-11	0.000124937	44.1473
rs9819463	CACNA1D	3	53672471	C	T	0.204896	0.00609644	0.00108031	1.7e-08	9.01269e-05	31.8459
rs9912501	LINC01975	17	3881345	T	C	0.523982	-0.00530769	0.000871798	1.09999e-09	0.000104899	37.0661
rs10857859#	DENND2D	1	111733724	C	G	0.333655	-0.0053299	0.000925404	8.40001e-09
rs13033579#	FAM171B	2	187586599	G	C	0.294981	0.00659167	0.000953433	4.70002e-12
rs1854577#	RP11-495L19.1	9	23589354	C	G	0.477025	-0.00609843	0.000883709	5.19996e-12
rs2047408#	TET2	4	106123582	C	G	0.670633	0.00674934	0.00092701	3.29989e-13
rs2575708#	SDC2	8	97517350	G	C	0.304945	-0.00527039	0.000945857	2.5e-08
rs2896630#	RP11-413N13.1	11	13167748	T	A	0.544078	0.00539274	0.000877118	7.79992e-10
rs594476#	RN7SL222P	11	100498196	C	G	0.706452	-0.00552147	0.000964958	1.09999e-08
rs73158393#	SYN3	22	33335386	G	C	0.258163	-0.00625553	0.000995762	3.29997e-10
rs7968719#	LRP1	12	57540751	G	C	0.528084	-0.00550538	0.000871931	2.69998e-10
rs912056#	TMEM14C	6	6736197	T	A	0.617172	-0.00619018	0.000900789	6.29941e-12
rs9351958#	KCNQ5	6	73661010	C	G	0.198673	-0.00745279	0.00108826	7.50067e-12
rs987068#	SPATA9	5	95025146	C	G	0.687665	0.00785448	0.000937607	5.40008e-17
Total										0.0176979	58.7344
IV, instrumental variable; FEV1, forced expiratory volume in 1; FVC, forced vital capacity; Chr, chromosome; EA, effect allele;NEA, non-effect allele; EAF, effect allele frequency; SE, standard error; SNP, single nucleotide polymorphism.
aR2 were calculated using the following formula: (2×EAF×(1-EAF)×beta2)/[(2×EAF×(1-EAF)×beta2) + (2×EAF×(1-EAF)×N×SE2)], where EAF is the effect allele frequency, beta is the estimated effect on FEV1/FVC is the sample size of the GWAS for the SNP-fev1/fvc association and SE is the standard error of the estimated effect.
bF-statistic were calculated using the following formula: R2(N-2)/(1-R2), where R2 is the proportion of variance in FEV1/FVC explained by each instrument and N is the sample size of the GWAS for the FEV1/FVC association.
#Removing the following SNPs for being palindromic with intermediate allele frequencies.
Supplementary Table 9 Priori power calculation for the association estimates in MR analyses.
Exposure	R2	Outcome	Sample size of outcome GWAS (controls vs cases,)	Power to detect OR/β of following magnitude
				OR=0.95, β=-0.051	OR=0.90, β=-0.105	OR=0.85, β=-0.163	OR=0.8, β=-0.223	OR=0.75, β=-0.288
T2D	0.0248	FEV1	345665	0.96	1	1	1	1
	0.0248	FVC	345665	0.96	1	1	1	1
	0.0248	FEV1/FVC	353315(5.32)	0.11	0.74	1	1	1
Fasting glucose	0.0041	FEV1	345665	0.15	0.84	1	1	1
	0.0041	FVC	345665	0.15	0.84	1	1	1
	0.0041	FEV1/FVC	353315(5.32)	0.01	0.07	0.24	0.55	0.85
Fasting insulin	0.0034	FEV1	345665	0.11	0.74	1	1	1
	0.0034	FVC	345665	0.11	0.74	1	1	1
	0.0034	FEV1/FVC	353315(5.32)	0.01	0.05	0.18	0.44	0.75
HbA1c	0.0276	FEV1	345665	0.98	1	1	1	1
	0.0276	FVC	345665	0.98	1	1	1	1
	0.0276	FEV1/FVC	353315(5.32)	0.13	0.8	1	1	1
Fasting proinsulin	0.0597	FEV1	345665	1	1	1	1	1
	0.0597	FVC	345665	1	1	1	1	1
	0.0597	FEV1/FVC	353315(5.32)	0.4	1	1	1	1
FEV1	0.0338	T2D	807,553(11.12)	0.26	0.97	1	1	1
	0.0338	Fasting glucose	58074	0.24	0.95	1	1	1
	0.0338	Fasting insulin	51750	0.2	1	1	1	1
	0.0338	HbA1c	123665	0.63	1	1	1	1
	0.0338	Fasting proinsulin	10701	0.02	1	1	1	1
FVC	0.0476	T2D	807,553(11.12)	0.42	1	1	1	1
	0.0476	Fasting glucose	58074	0.39	1	1	1	1
	0.0476	Fasting insulin	51750	0.33	0.99	1	1	1
	0.0476	HbA1c	123665	0.83	1	1	1	1
	0.0476	Fasting proinsulin	10701	0.04	1	1	1	1
FEV1/FVC	0.0177	T2D	807,553(11.12)	0.1	0.69	1	1	1
	0.0177	Fasting glucose	58074	0.09	0.66	0.99	1	1
	0.0177	Fasting insulin	51750	0.08	1	1	1	1
	0.0177	HbA1c	123665	0.27	1	1	1	1
	0.0177	Fasting proinsulin	10701	0.001	1	1	1	1
GWAS, genome-wide association study; HbA1c, hemoglobinA1c; HOMA-IR, homeostasis model assessment of insulin resistance; OR, odds ratio; β, beta; R2, variance in exposure traits explained by single nucleotide polymorphisms; T2D, type 2 diabetes; FEV1, forced expiratory volume in 1; FVC, forced vital capacity.
Supplementary Table 10 MR results of association between fasting glucose and pulmonary function.
		Beta	95%CI-lower	95%CI-upper	P
FEV1
	MR Egger	-0.261622	-1.33379	0.810547	0.652642
	Weighted median	-0.0265532	-0.300446	0.24734	0.849296
	IVW	-0.0722144	-0.291468	0.14704	0.518569
	MR-RAPS	-0.072195	-0.3064	0.16201	0.545723
	MR PRESSO	-0.0722144	-0.218863	0.0744346	0.371737
	MVMR	-0.0678456	-0.18604	0.0503484	0.260556
FVC
	MR Egger	0.0542219	-1.01899	1.12743	0.924966
	Weighted median	0.0945739	-0.182268	0.371416	0.503132
	IVW	0.0669759	-0.152919	0.286871	0.550521
	MR-RAPS	0.0679253	-0.16708	0.302931	0.571045
	MR PRESSO	0.0669759	-0.0944366	0.228388	0.447123
	MVMR	0.0737985	-0.105398	0.252995	0.419559
FEV1/FVC
	MR Egger	-0.986274	-2.05079	0.0782456	0.129083
	Weighted median	-0.375934	-0.660335	-0.0915332	0.00957481
	IVW	-0.270348	-0.488172	-0.0525244	0.01499
	MR-RAPS	-0.274109	-0.509652	-0.0385664	0.0225533
	MR PRESSO	-0.270348	-0.438561	-0.102135	0.0198131
	MVMR	-0.272624	-0.463052	-0.0821953	0.00501604
CI, confidence interval; IVW, Inverse variance weighted; MR, Mendelian randomization; MR-RAPS, MR robust adjusted profile score; MR PRESSO, MR Pleiotropy RESidual Sum and Outlier; MVMR, multivariable MR; SNP, single nucleotide polymorphism; FEV1, forced expiratory volume in 1; FVC, forced vital capacity; FEV1/FVC, FEV1/FVC ratio; P, P-value.
Supplementary Table 11 MR results of association between fasting insulin and pulmonary function.
		Beta	95%CI-lower	95%CI-upper	P
FEV1
	MR Egger	-1.50807	-4.52861	1.51247	0.399958
	Weighted median	0.143547	-0.300598	0.587691	0.526428
	IVW	0.245101	-0.0954313	0.585632	0.158325
	MR-RAPS	0.249263	-0.119197	0.617724	0.18486
	MR PRESSO	0.245101	-0.0213191	0.51152	0.145702
	MVMR	0.0731016	-0.365808	0.512012	0.744089
FVC
	MR Egger	-0.498987	-4.59915	3.60118	0.826835
	Weighted median	0.129498	-0.349728	0.608723	0.596364
	IVW	0.00634272	-0.39793	0.410615	0.975468
	MR-RAPS	0.00731952	-0.425287	0.439926	0.973545
	MR PRESSO	0.00634272	-0.39793	0.410615	0.976941
	MVMR	0.198209	-0.689727	1.08614	0.661735
FEV1/FVC
	MR Egger	-1.47809	-9.0756	6.11942	0.728372
	Weighted median	0.115081	-0.420869	0.651031	0.673859
	IVW	0.348173	-0.421068	1.11741	0.375007
	MR-RAPS	0.226484	-0.520034	0.973001	0.552085
	MR PRESSO	-0.0237392	-0.515478	0.468	0.930582
	MVMR	-0.191665	-1.64218	1.25885	0.795647
CI, confidence interval; IVW, Inverse variance weighted; MR, Mendelian randomization; MR-RAPS, MR robust adjusted profile score; MR PRESSO, MR Pleiotropy RESidual Sum and Outlier; MVMR, multivariable MR; SNP, single nucleotide polymorphism; FEV1, forced expiratory volume in 1; FVC, forced vital capacity; FEV1/FVC, FEV1/FVC ratio; P, P-value.
Supplementary Table 12 MR results of association between HbA1C and pulmonary function.
		Beta	95%CI-lower	95%CI-upper	P
FEV1
	MR Egger	0.0267526	-0.273431	0.326936	0.862193
	Weighted median	0.114482	-0.0458084	0.274772	0.161554
	IVW	-0.0443874	-0.194505	0.10573	0.562223
	MR-RAPS	-0.00330883	-0.156026	0.149409	0.966127
	MR PRESSO	0.012092	-0.12245	0.146634	0.86106
	MVMR	0.00366334	-0.142404	0.149731	0.960795
FVC
	MR Egger	0.0935329	-0.196192	0.383258	0.530408
	Weighted median	0.112465	-0.0484963	0.273426	0.170853
	IVW	-0.0905	-0.238529	0.057529	0.230808
	MR-RAPS	-0.0507996	-0.223569	0.12197	0.564412
	MR PRESSO	-0.0742702	-0.21576	0.0672197	0.309589
	MVMR	-0.0446756	-0.187838	0.0984873	0.540776
FEV1/FVC
	MR Egger	-0.090257	-0.30161	0.121096	0.407442
	Weighted median	0.0331591	-0.121575	0.187894	0.674469
	IVW	0.0607621	-0.0478837	0.169408	0.273007
	MR-RAPS	0.0596611	-0.0489693	0.168292	0.281723
	MR PRESSO	0.0607621	-0.0478837	0.169408	0.279252
	MVMR	0.0787369	-0.0287036	0.186177	0.150897
HbA1c, glycated hemoglobinA1c; CI, confidence interval; IVW, Inverse variance weighted; MR, Mendelian randomization; MR-RAPS, MR robust adjusted profile score; MR PRESSO, MR Pleiotropy RESidual Sum and Outlier; MVMR, multivariable MR; SNP, single nucleotide polymorphism; FEV1, forced expiratory volume in 1; FVC, forced vital capacity; FEV1/FVC, FEV1/FVC ratio; P, P-value.
Supplementary Table 13 MR results of association between fasting proinsulin and pulmonary function.
		Beta	95%CI-lower	95%CI-upper	P
FEV1
	MR Egger	-0.087768	-0.229475	0.0539387	0.270376
	Weighted median	-0.0392228	-0.112369	0.0339233	0.293257
	IVW	-0.0208998	-0.0789804	0.0371808	0.480631
	MR-RAPS	-0.0237936	-0.0842814	0.0366941	0.440712
	MR PRESSO	-0.0208998	-0.0734446	0.0316451	0.461171
	MVMR	-0.0266151	-0.0950705	0.0418404	0.446038
FVC
	MR Egger	-0.0584668	-0.200605	0.083672	0.450881
	Weighted median	-0.0105507	-0.0850262	0.0639247	0.781267
	IVW	-0.0217971	-0.0800596	0.0364655	0.463393
	MR-RAPS	-0.0232656	-0.0840101	0.0374789	0.452836
	MR PRESSO	-0.0217971	-0.0672131	0.023619	0.378185
	MVMR	-0.0312288	-0.0831926	0.0207349	0.238833
FEV1/FVC
	MR Egger	-0.024581	-0.257649	0.208487	0.843069
	Weighted median	0.0587411	-0.0303319	0.147814	0.196162
	IVW	0.0199853	-0.069675	0.109646	0.662195
	MR-RAPS	0.023328	-0.0679985	0.114654	0.616616
	MR PRESSO	0.0199853	-0.069675	0.109646	0.675355
	MVMR	0.0320584	-0.0811005	0.145217	0.578706
CI, confidence interval; IVW, Inverse variance weighted; MR, Mendelian randomization; MR-RAPS, MR robust adjusted profile score; MR PRESSO, MR Pleiotropy RESidual Sum and Outlier; MVMR, multivariable MR; SNP, single nucleotide polymorphism; FEV1, forced expiratory volume in 1; FVC, forced vital capacity; FEV1/FVC, FEV1/FVC ratio; P, P-value.
Supplementary Table 14 MR results of association between FEV1 and glycemic traits.
		Beta	95%CI-lower	95%CI-upper	P
Fasting glucose
	MR Egger	-0.0407413	-0.189026	0.107543	0.591055
	Weighted median	-0.0054244	-0.0622197	0.0513709	0.851507
	IVW	-0.00149448	-0.0424652	0.0394763	0.943004
	MR-RAPS	0.00100343	-0.0433383	0.0453452	0.964622
	MR PRESSO	-0.00508559	-0.0449789	0.0348077	0.802997
	MVMR	0.00672714	-0.0363796	0.0498339	0.759702
Fasting insulin
	MR Egger	-0.00880493	-0.178011	0.160401	0.918905
	Weighted median	-0.00700276	-0.065963	0.0519575	0.815924
	IVW	-0.0202584	-0.0666232	0.0261063	0.391779
	MR-RAPS	-0.0329356	-0.0799169	0.0140456	0.169431
	MR PRESSO	-0.0329996	-0.0730309	0.00703176	0.108033
	MVMR	-0.000743044	-0.0485048	0.0470187	0.975674
HbA1C
	MR Egger	0.0183705	-0.100243	0.136984	0.762108
	Weighted median	-0.00932079	-0.0505612	0.0319196	0.657779
	IVW	0.00405806	-0.0274979	0.035614	0.801
	MR-RAPS	0.00662279	-0.026669	0.0399145	0.696606
	MR PRESSO	0.00882505	-0.0221726	0.0398227	0.384898
	MVMR	0.0113904	-0.0208044	0.0435852	0.488033
Fasting proinsulin
	MR Egger	-0.0267556	-0.34186	0.288349	0.868027
	Weighted median	0.107764	-0.00742784	0.222956	0.0667112
	IVW	0.0970753	0.0108665	0.183284	0.0273101
	MR-RAPS	0.0956156	0.00996755	0.181264	0.0286622
	MR PRESSO	0.107	0.0268528	0.187147	0.00966919
	MVMR	0.126194	0.0299412	0.222447	0.0101789
HbA1c, glycated hemoglobinA1c; CI, confidence interval; IVW, Inverse variance weighted; MR, Mendelian randomization; MR-RAPS, MR robust adjusted profile score; MR PRESSO, MR Pleiotropy RESidual Sum and Outlier; MVMR, multivariable MR; SNP, single nucleotide polymorphism; FEV1, forced expiratory volume in 1; FVC, forced vital capacity; P, P-value;T2D, type 2 diabetes.
Supplementary Table 15 MR results of association between FVC and glycemic traits.
		Beta	95%CI-lower	95%CI-upper	P
Fasting glucose
	MR Egger	-0.0496026	-0.171699	0.0724934	0.426961
	Weighted median	-0.037485	-0.092076	0.0171059	0.178354
	IVW	-0.0174217	-0.0570511	0.0222076	0.38888
	MR-RAPS	-0.0266851	-0.0687017	0.0153316	0.213202
	MR PRESSO	-0.0344317	-0.0715231	0.00265962	0.0703145
	MVMR	-0.00820393	-0.0496223	0.0332144	0.697848
Fasting insulin
	MR Egger	-0.104311	-0.230096	0.021474	0.10589
	Weighted median	-0.0193923	-0.0723095	0.033525	0.472591
	IVW	-0.034008	-0.0747346	0.00671871	0.101702
	MR-RAPS	-0.040083	-0.081876	0.00170994	0.0601343
	MR PRESSO	-0.0412047	-0.0768696	-0.00553986	0.0246137
	MVMR	-0.0125249	-0.0539	0.0288503	0.552967
HbA1C
	MR Egger	0.00773525	-0.0695301	0.0850006	0.84478
	Weighted median	0.000270825	-0.0375629	0.0381045	0.988806
	IVW	0.0204804	-0.00630921	0.04727	0.134029
	MR-RAPS	0.0183976	-0.0102277	0.0470228	0.207778
	MR PRESSO	0.0112727	-0.0142902	0.0368357	0.389124
	MVMR	0.0210059	-0.00726338	0.0492751	0.14528
Fasting proinsulin
	MR Egger	-0.035565	-0.256899	0.185769	0.75314
	Weighted median	0.0810253	-0.0299574	0.192008	0.152447
	IVW	0.0851291	0.0122554	0.158003	0.0220434
	MR-RAPS	0.0747605	-0.000301337	0.149822	0.0509226
	MR PRESSO	0.0771098	0.00514143	0.149078	0.0369499
	MVMR	0.0946496	0.0187015	0.170598	0.0145806
HbA1c, glycated hemoglobinA1c; CI, confidence interval; IVW, Inverse variance weighted; MR, Mendelian randomization; MR-RAPS, MR robust adjusted profile score; MR PRESSO, MR Pleiotropy RESidual Sum and Outlier; MVMR, multivariable MR; SNP, single nucleotide polymorphism; FVC, forced vital capacity; P, P-value;T2D, type 2 diabetes.
Supplementary Table 16 MR results of association between FEV1/FVC and glycemic traits.
		Beta	95%CI-lower	95%CI-upper	P
Fasting glucose
	MR Egger	0.151809	-0.19171	0.495327	0.389276
	Weighted median	0.0939593	-0.0742162	0.262135	0.273495
	IVW	0.0900657	-0.0344611	0.214593	0.156308
	MR-RAPS	0.106079	-0.0253971	0.237555	0.113789
	MR PRESSO	0.0745754	-0.0402924	0.189443	0.20667
	MVMR	0.110128	-0.0172658	0.237522	0.0901971
Fasting insulin
	MR Egger	0.419166	0.0959053	0.742427	0.0131918
	Weighted median	0.112755	-0.06456	0.290069	0.21263
	IVW	0.0404785	-0.081214	0.162171	0.514431
	MR-RAPS	0.0660276	-0.065371	0.197426	0.324675
	MR PRESSO	0.0323715	-0.0761091	0.140852	0.560177
	MVMR	0.0472204	-0.0807284	0.175169	0.469464
HbA1C
	MR Egger	0.120373	-0.106435	0.347181	0.303448
	Weighted median	-0.0185581	-0.135778	0.0986619	0.75633
	IVW	0.00948383	-0.0766457	0.0956133	0.82913
	MR-RAPS	-0.00601165	-0.0883564	0.0763331	0.886218
	MR PRESSO	0.00568162	-0.0782391	0.0896023	0.894956
	MVMR	-0.000359383	-0.0950351	0.0943164	0.994064
Fasting proinsulin
	MR Egger	-0.16497	-0.902188	0.572248	0.662107
	Weighted median	-0.0419678	-0.415472	0.331536	0.825692
	IVW	0.0613646	-0.199151	0.321881	0.644312
	MR-RAPS	0.0488643	-0.219558	0.317286	0.721239
	MR PRESSO	0.0908057	-0.166572	0.348183	0.491108
	MVMR	0.0556355	-0.211195	0.322466	0.682781
HbA1c, glycated hemoglobinA1c; CI, confidence interval; IVW, Inverse variance weighted; MR, Mendelian randomization; MR-RAPS, MR robust adjusted profile score; MR PRESSO, MR Pleiotropy RESidual Sum and Outlier; MVMR, multivariable MR; SNP, single nucleotide polymorphism; FEV1, forced expiratory volume in 1; FVC, forced vital capacity;FEV1/FVC, FEV1/FVC ratio; P, P-value;T2D, type 2 diabetes.
